## REVIEW

# The UPRosome – decoding novel biological outputs of IRE1 $\alpha$ function

Hery Urra<sup>1,2,3,\*</sup>, Philippe Pihán<sup>1,2,3</sup> and Claudio Hetz<sup>1,2,3,4,\*</sup>

## ABSTRACT

Different perturbations alter the function of the endoplasmic reticulum (ER), resulting in the accumulation of misfolded proteins in its lumen, a condition termed ER stress. To restore ER proteostasis, a highly conserved pathway is engaged, known as the unfolded protein response (UPR), triggering adaptive programs or apoptosis of terminally damaged cells. IRE1 $\alpha$  (also known as ERN1), the most conserved UPR sensor, mediates the activation of responses to determine cell fate under ER stress. The complexity of IRE1 $\alpha$  regulation and its signaling outputs is mediated in part by the assembly of a dynamic multi-protein complex, named the UPRosome, that regulates IRE1 $\alpha$  activity and the crosstalk with other pathways. We discuss several studies identifying components of the UPRosome that have illuminated novel functions in cell death, autophagy, DNA damage, energy metabolism and cytoskeleton dynamics. Here, we provide a theoretical analysis to assess the biological significance of the UPRosome and present the results of a systematic bioinformatics analysis of the available IRE1 $\alpha$  interactome data sets followed by functional enrichment clustering. This *in silico* approach decoded that IRE1 $\alpha$  also interacts with proteins involved in the cell cycle, transport, differentiation, response to viral infection and immune response. Thus, defining the spectrum of IRE1 $\alpha$ -binding partners will reveal novel signaling outputs and the relevance of the pathway to human diseases.

**KEY WORDS:** IRE1 $\alpha$ , UPRosome, ER stress, Cell fate

## Introduction

The endoplasmic reticulum (ER) is a highly dynamic and complex membranous network, responsible for a variety of crucial cellular functions, including protein synthesis and folding, and intracellular Ca<sup>2+</sup> storage (Schwarz and Blower, 2016). A complex network of chaperones, foldases and cofactors, in addition to specific ionic and redox requirements, tightly control protein folding and quality within the ER lumen (Dubnikov et al., 2017). However, a significant amount of newly synthesized proteins do not reach their proper folding state and are delivered to the proteasome by the ER-associated degradation (ERAD) machinery (Hwang and Qi, 2018). Altered ER function can lead to the abnormal accumulation of unfolded or misfolded proteins, a condition known as ‘ER stress’ (Walter and Ron, 2011). ER stress triggers a series of adaptive mechanisms collectively known as the unfolded protein response (UPR) (Hetz, 2012; Walter and Ron, 2011). UPR signaling results

in transcriptional and translational responses in order to increase the protein folding capacity of the cell and restore proteostasis (Oakes and Papa, 2015). If the UPR is unable to cope with protein misfolding stress, the pathway activates self-destruction programs to eliminate damaged cells by apoptosis (Urta et al., 2013).

Abnormal levels of ER stress are implicated in a variety of human diseases, including cancer, metabolic disorders, inflammation and neurodegenerative diseases (Wang and Kaufman, 2016). However, novel biological functions of the UPR beyond its traditional role in protein homeostasis are currently emerging. The UPR consists of three arms and the most conserved branch is initiated by the stress sensor inositol-requiring enzyme 1 $\alpha$  (IRE1 $\alpha$ ; also known as ERN1) (Walter and Ron, 2011). The activation status of IRE1 $\alpha$  signaling is regulated by the assembly of a multiprotein platform at the ER membrane, which we have previously termed the UPRosome (Hetz and Glimcher, 2009). The UPRosome also controls the crosstalk between the UPR and other stress pathways through the binding of adapter and signaling proteins and, in addition, might mediate non-canonical functions of the UPR (Hetz et al., 2020).

Here, we review all available protein–protein interaction studies to discuss emerging roles of the UPR in the control of cell function in addition to highlight novel regulatory aspects of IRE1 $\alpha$ . We also present a new global analysis of available interactome data sets to speculate about possible novel functions of IRE1 $\alpha$  in normal physiology and disease.

## ER stress and the UPR

Under normal conditions, specialized secretory cells (i.e. pancreatic  $\beta$ -cells, B cell lymphocytes and salivary glands) require an active UPR to cope with the high demand for folded proteins, which generates abnormal levels of misfolded or unfolded intermediates. In addition, a number of conditions, such as hypoxia, nutrient deprivation, mutations in secretory cargoes and loss of Ca<sup>2+</sup>, redox or lipid homeostasis, can also result in altered ER protein homeostasis or ‘proteostasis’ (Walter and Ron, 2011). In the past 20 years, chronic ER stress and overactivation of the UPR have been proposed as a relevant contributor to the development of several diseases, including cancer, diabetes, neurodegeneration and inflammatory disorders, among others (Wang and Kaufman, 2016). Activation of the UPR reprograms the transcription of hundreds of genes involved in different aspects of the secretory pathway including the translocation of proteins into the ER, protein folding, glycosylation, redox metabolism, protein quality control, translation, ERAD and lipid biogenesis, among others (Hetz, 2012). If chronic ER stress results in irreversible cellular damage, UPR signaling switches from adaptive to pro-apoptotic programs through the engagement of several cell death mechanisms (Tabas and Ron, 2011; Urta et al., 2013).

The UPR is initiated by three types of ER transmembrane proteins that act as ER stress sensors and transducers, including IRE1 $\alpha$  and IRE1 $\beta$  (ERN2), activating transcription factor 6 (ATF6; also known as ATF6 $\alpha$ ) and ATF6 $\beta$  (also known as

<sup>1</sup>Biomedical Neuroscience Institute (BNI), Faculty of Medicine, University of Chile, Santiago 8380453, Chile. <sup>2</sup>Center for Geroscience, Brain Health and Metabolism (GERO), Santiago 7800003, Chile. <sup>3</sup>Program of Cellular and Molecular Biology, Institute of Biomedical Sciences (ICBM), University of Chile, Santiago 8380453, Chile. <sup>4</sup>The Buck Institute for Research in Aging, Novato, CA 94945, USA.

\*Authors for correspondence (chetz@med.uchile.cl; hery.urra@ug.uchile.cl)

 H.U., 0000-0002-6846-558X; P.P., 0000-0002-1109-858X; C.H., 0000-0001-7724-1767

ATF6B), and protein kinase RNA (PKR)-like ER kinase (PERK; also known as EIF2AK3) (Box 1). These sensors act in concert to regulate downstream transcription factors that engage adaptive or pro-apoptotic programs depending of the extent of cellular damage (Box 1).

The most conserved pathway of the UPR is initiated by the serine/threonine protein kinase IRE1 $\alpha$ . Under ER stress, IRE1 $\alpha$  dimerizes and auto-transphosphorylates, favoring a conformational change that activates its endoribonuclease domain (Karagöz et al., 2019). Active IRE1 $\alpha$  catalyzes the excision of a 26-nucleotide intron in the mRNA encoding the transcriptional factor X-box binding protein-1 (XBP1) (Walter and Ron, 2011), which then is ligated by the tRNA ligase RTCB (Jurkin et al., 2014; Kosmaczewski et al., 2014; Lu et al., 2014). This processing event leads to a shift in the open reading frame of the *XBP1* mRNA, generating a new C-terminal domain sequence (Calfon et al., 2002; Lee et al., 2002; Yoshida et al., 2001). The resulting spliced XBP1 protein (XBP1s) acts as a potent transcription factor that controls the upregulation of several UPR genes involved in protein folding, protein entry into the ER

and ERAD (Hetz et al., 2011). In addition, the RNase domain of IRE1 $\alpha$  can mediate the direct cleavage of multiple RNAs, in a process known as regulated IRE1 $\alpha$ -dependent decay (RIDD) (Hollien et al., 2009; Hollien and Weissman, 2006). RIDD involves the cleavage of conserved RNA sequences that contain a specific secondary structure similar to the hairpins present in the mRNA of XBP1 (Maurel et al., 2014). The binding of IRE1 $\alpha$  to the adaptor protein TNFR-associated factor 2 (TRAF2) can engage the activation of other signaling pathways, such as MAPK pathways, regulating cell death and autophagy (Nishitoh et al., 2002; Urano et al., 2000) (see figure in Box 1). Active IRE1 $\alpha$  molecules can be found as dimers and oligomers, which might determine the regulation of *XBP1* mRNA splicing and RIDD (Bouchecareilh et al., 2011; Ghosh et al., 2014; Wang et al., 2012). Nevertheless, the molecular mechanism underlying the selectivity for mRNA substrates is still controversial and poorly understood. In summary, the UPR represents a network of signaling pathways that orchestrate adaptive responses to ER stress on a dynamic and regulated manner.

### Box 1. The unfolded protein response

The UPR is controlled by three ER transmembrane proteins named IRE1 $\alpha$ , PERK and ATF6 (see figure). PERK is a type I protein kinase, which under ER stress phosphorylates the eukaryotic translation initiator factor-2 (eIF2 $\alpha$ ) at serine 51, resulting in the inhibition of general protein translation (Harding et al., 2000b). In addition, this event simultaneously triggers the selective translation of mRNAs that contain inhibitory upstream open reading frames (uORFs) within their 5'-untranslated region (UTR) such as the activating transcription factor 4 (ATF4) (Vattem and Wek, 2004). ATF4 controls the expression of genes involved in the antioxidant response, folding capacity, amino acid metabolism and autophagy (Harding et al., 2000a). Upon chronic ER stress, ATF4 upregulates the transcription factor CCAAT-enhancer-binding protein homologous protein (CHOP; also known as GADD153), resulting in the activation of pro-apoptotic programs (Tabas and Ron, 2011; Urrea et al., 2013). For instance, CHOP induces the expression of the phosphatase subunit (GADD34 or PP1C) that results in eIF2 $\alpha$  de-phosphorylation, thereby restoring protein synthesis and resulting in oxidative stress and proteotoxicity (Han et al., 2013; Marciniak et al., 2004). ATF6 is an ER transmembrane protein that contains a bZIP transcription factor in its cytosolic domain. Upon ER stress, ATF6 is cleaved in the Golgi apparatus by the site-1 and site-2 proteases (S1P and S2P), resulting in the release of its cytosolic region (ATF6f) (Haze et al., 1999). ATF6f then acts as a potent transcription factor, regulating many UPR target genes that are related to ERAD and protein folding (Adachi et al., 2008; Yamamoto et al., 2007).

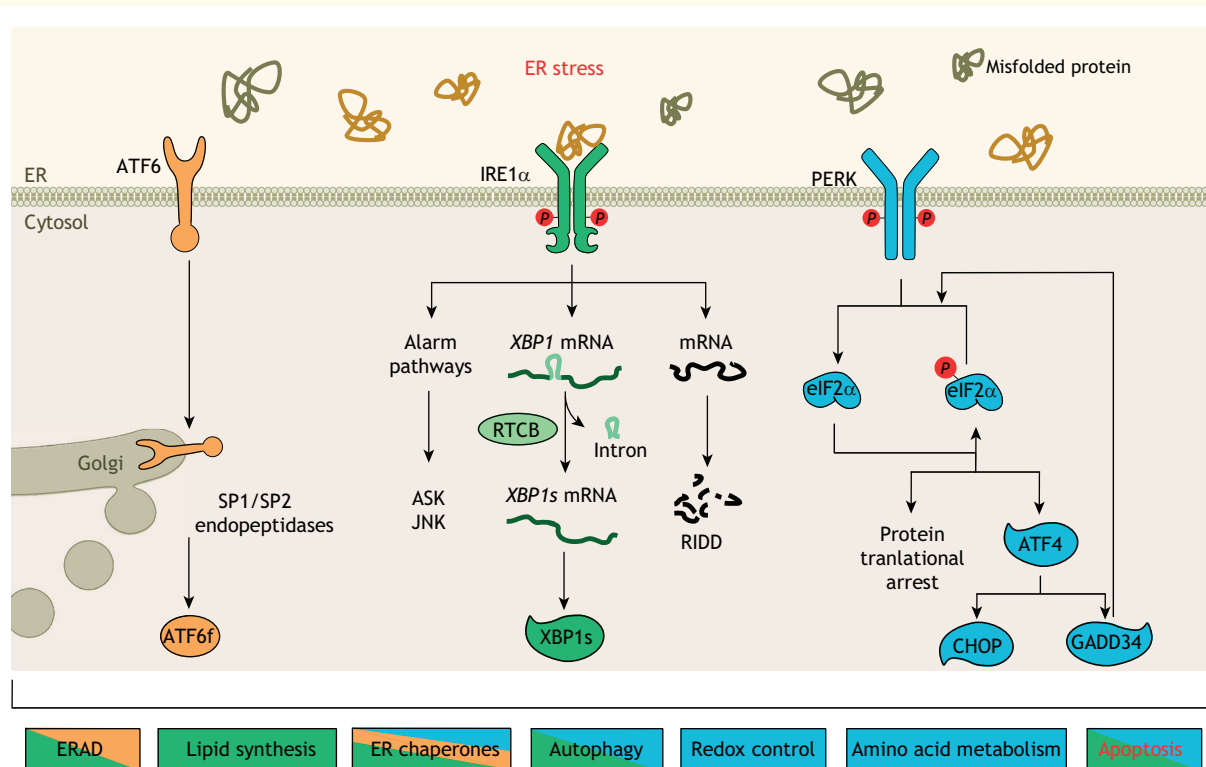

### IRE1 $\alpha$ stress-sensing mechanism and regulation

For almost 20 years, it has been assumed that the chaperone BiP (also known as Grp78 and HSPA5) is the main mediator involved in the activation of all three UPR stress transducers (Bertolotti et al., 2000; Shen et al., 2002). However, accumulating evidence suggests that additional regulators and modes of activation exist. In yeast, Kar2 (a homolog of BiP) interacts with the luminal domain of IRE1p, keeping it in a monomeric and inactive form (Okamura et al., 2000). Interestingly, the direct binding of misfolded proteins to a MHC-like groove present in the luminal domain of IRE1p has been proposed to trigger its activation (Credle et al., 2005; Gardner and Walter, 2011).

For mammalian IRE1 $\alpha$ , the mechanisms of activation are still under debate and three different models have been proposed (for extensive reviews see Adams et al., 2019; Karagöz et al., 2019; Preissler and Ron, 2019). Historically, it has been proposed that IRE1 $\alpha$  monomers are prone to spontaneously forming dimers and become activated, a process inhibited by a physical interaction with BiP (Bertolotti et al., 2000). In this model, BiP binding destabilize IRE1 $\alpha$  dimers, resulting in their inactivation, whereas, under ER stress, BiP preferentially binds unfolded proteins, releasing IRE1 $\alpha$ , which then spontaneously activates (Amin-Wetzel et al., 2019, 2017). Alternatively, BiP has been suggested to act as a sensor where the binding of misfolded proteins to its substrate-binding domain (SBD) transduce signals to IRE1 $\alpha$  through its ATPase domain (Carrara et al., 2015; Kopp et al., 2018). Once BiP is released from the IRE1 $\alpha$  luminal domain, it interacts with substrates to assist the folding of non-native proteins at the ER (Adams et al., 2019). A recent report also reinforced the idea of

a crucial role for BiP in the activation and clustering of IRE1 $\alpha$  (Ricci et al., 2019) (Fig. 1). As for its yeast homolog, mammalian IRE1 $\alpha$  also contains an MHC-like groove at the interface facing the ER lumen; however, the volume and positioning of this groove, as resolved in the crystal structure, was not compatible with peptide binding (Zhou et al., 2006). In contrast, *in vitro* studies have demonstrated that misfolded proteins can bind to the luminal domain of IRE1 $\alpha$ , inducing a structural rearrangement that facilitates its dimerization (Karagöz et al., 2017) (Fig. 1). However, the experimental systems used in these studies are exclusively based on *in vitro* approaches and further work is needed to demonstrate the so-called 'direct recognition model'. Besides, other studies have failed to detect the binding of misfolded proteins to the luminal domain of IRE1 $\alpha$  (Oikawa et al., 2009). Interestingly, structural and functional analysis of the luminal domain of PERK suggest that it is also able to bind to misfolded proteins (Dalton et al., 2018 preprint; Wang et al., 2018b).

Recent studies have also suggested a new concept whereby IRE1 $\alpha$  signaling is coupled to the function of a network of ER luminal chaperones. For example, the binding of BiP to IRE1 $\alpha$  is mediated by the co-chaperone ERdj4 (also known as DNAJB9), functioning as a recycling loop to keep IRE1 $\alpha$  in a monomeric state (Amin-Wetzel et al., 2017) (Fig. 1). In addition, using an interactome screen followed by functional validation we recently identified HSP47 (also known as SERPINH1), a collagen-specific chaperone, as a new IRE1 $\alpha$ -binding partner that facilitates the dissociation of BiP from its luminal domain. HSP47 binding to IRE1 $\alpha$  promotes its activation (Sepulveda et al., 2018) (Fig. 1).

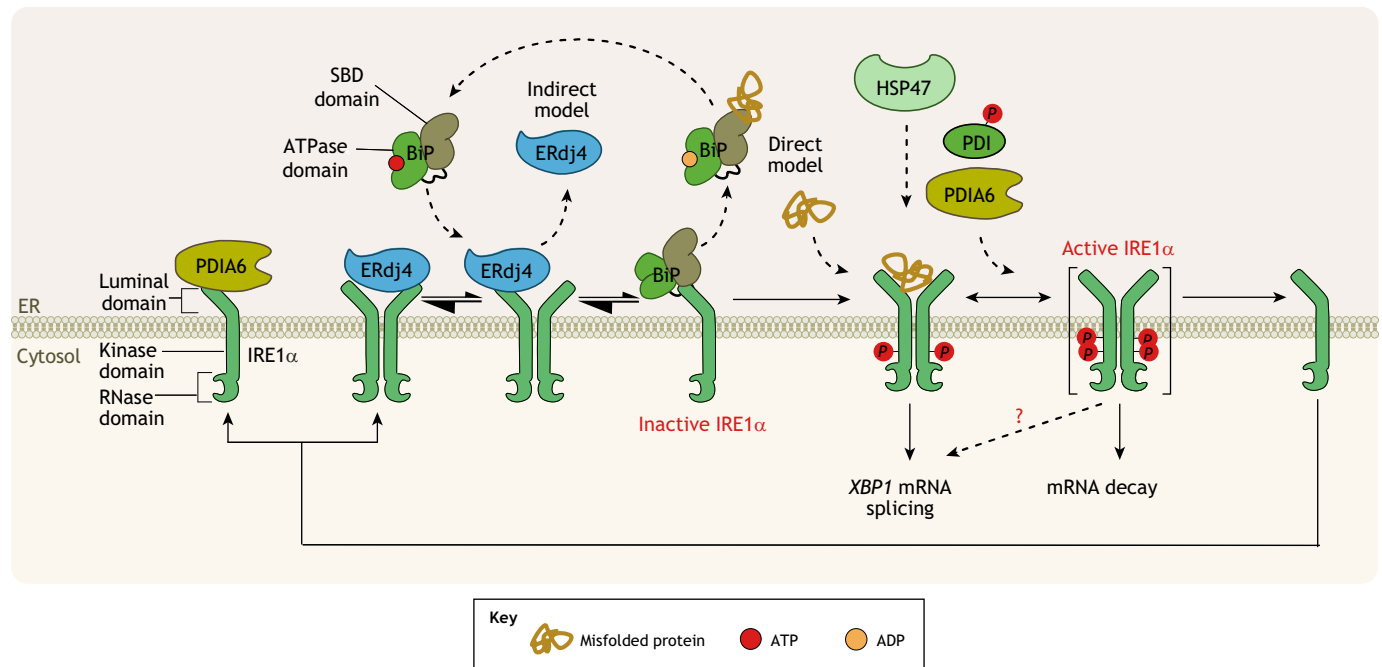

**Fig. 1. Sensing of ER stress by mammalian IRE1 $\alpha$ .** IRE1 $\alpha$  is maintained in a repressed and monomeric state through an association with the ATPase domain of BiP (brighter green) through a recycling mechanism that involves ERdj4. ERdj4 binds to the IRE1 $\alpha$  luminal domain, which leads to BiP recruitment. The interaction between ERdj4 and the substrate-binding domain (SBD) of BiP (in darker green) results in the activation of the ATPase domain of BiP and the dissociation of ERdj4, thus BiP–ERdj4-mediated repressing mechanism is crucial for maintaining IRE1 $\alpha$  in a monomeric and inactive form. Then, BiP is released from the IRE1 $\alpha$  luminal domain allowing the interaction with misfolded proteins. Upon ER stress, misfolded proteins dock to the SBD of BiP, triggering the dissociation from IRE1 $\alpha$  through allosteric regulation (indirect model). In addition, misfolded proteins interact directly with the luminal domain of IRE1 $\alpha$ , promoting IRE1 $\alpha$  dimerization (direct model). These events induce the auto-transphosphorylation of IRE1 $\alpha$ , which induces a conformational change in its RNase domain that allows its activation. Besides the BiP- and ERdj4-mediated repressing mechanism, IRE1 $\alpha$  activation may be regulated by other ER chaperones, such as HSP47 and PDIA6, which can further boost IRE1 $\alpha$  signaling, or by PDIA1 (also known as PDI) that can inhibit IRE1 $\alpha$  activity. HSP47 can bind to and displace BiP from the luminal domain of IRE1 $\alpha$ , thereby allowing the binding of misfolded proteins. During the attenuation phase, BiP and ERdj4 may operate as a buffer to sequester inactive IRE1 $\alpha$ .

Since collagens are the most abundant cargo of the secretory pathway, these findings suggest that the demand for collagen production is tightly coupled to the activation of the UPR, possibly as a mechanism to improve the secretory capacity of the cell (Rojas-Rivera et al., 2018). Furthermore, depending on the experimental setting, the disulfide isomerase PDIA6 attenuates or enhances IRE1 $\alpha$  signaling through an interaction with specific oxidized cysteine residues in the ER lumen (Eletto et al., 2016, 2014; Groenendyk et al., 2014). Recently, it has been demonstrated that phosphorylated PDI (also known as PDIA1) directly interacts with the IRE1 $\alpha$  luminal domain, reducing its activity under ER stress (Yu et al., 2020) (Fig. 1). Thus, these few studies suggest that multiple ER chaperones are coupled to the IRE1 $\alpha$  activation and signaling process to adjust the folding capacity of the cell.

Accumulating evidence indicates that IRE1 $\alpha$  is also activated by lipid bilayer stress. Structural and functional studies have revealed that the IRE1 $\alpha$  transmembrane domain is indispensable for its activation under lipid bilayer stress (Kono et al., 2017), while the luminal domain is not required (Volmer et al., 2013). A similar mechanism has also been proposed for ATF6 activation under these stress conditions (Tam et al., 2018). In addition to the transmembrane domain of IRE1 $\alpha$ , an adjacent amphipathic helix is required to sense lipid stress (Halbleib et al., 2017). Thus, the UPR-sensing mechanisms might be coupled to other homeostatic fluctuations that are beyond its function in protein folding stress.

### The UPRosome – fine-tuning ER stress signaling

Although all three UPR stress sensors are simultaneously activated under ER stress, studying the composition of the UPRosome has revealed a new paradigm whereby the kinetics and amplitude of their individual responses can be regulated through the selective binding of specific cofactors. The concept of the UPRosome suggests the establishment of a dynamic multi-protein platform in which IRE1 $\alpha$  associates with other components to regulate its signaling and crosstalk with other pathways (Hetz and Glimcher, 2009). Thus, UPR signaling intensity does not represent a direct measurement of stress levels since the amplitude and kinetics of IRE1 $\alpha$  downstream responses can be tuned by several positive and negative regulatory steps.

Because most of the studies characterizing IRE1 $\alpha$ -binding partners have only been performed once, or the characterizations use non-equivalent experimental conditions or were validated at different levels, here, we have compared the experimental conditions used in different studies to identify regulators of IRE1 $\alpha$  signaling. Almost 95% of the interactors described in the literature were defined using overexpression systems; however, 48% of them were also validated at the level of endogenous proteins or in cell-free systems with purified components to detect direct interactions. In addition, in many studies, the possible effects of ER stress on the formation of protein complexes were tested.

As shown in Table 1, many of the IRE1 $\alpha$ -binding partners have been described only once, with no follow-up studies confirming these interactions. Thus, readers must be aware of the differences between widely studied and confirmed interactors (i.e. BiP, PDIs and filamin A) and proteins that have been assessed only once. To this end we have summarized all the available data about IRE1 $\alpha$  interactors (Table 1).

IRE1 $\alpha$  has been described as a low-abundance protein in HeLa cells (Kulak et al., 2014), questioning the existence of multiple protein complexes or its function as a scaffold protein. The most probable scenario is that the interaction of IRE1 $\alpha$  with UPRosome components is highly dynamic and transient (a ‘hit and run’ model),

modulated by signaling events initiated by ER stress, or the interactions could depend on subpools of IRE1 $\alpha$  segregated by their oligomerization and phosphorylation state (or other post-translational modifications). Supporting this notion, it was recently demonstrated that IRE1 $\alpha$  cluster formation is highly dynamic, with changes within minutes upon ER stress (Belyy et al., 2020). An alternative hypothesis is that IRE1 $\alpha$  interactions occurred in subdomains within the ER membrane where some UPRosome components are enriched. This is supported by recent findings indicating the enrichment of IRE1 $\alpha$  and PERK in contacts between mitochondria and ER (Carreras-Sureda et al., 2019; Hayashi and Su, 2007; Mori et al., 2013) (see below). In addition, interactions of IRE1 $\alpha$  with the translocon (Acosta-Alvear et al., 2018; Plumb et al., 2015; Sundaram et al., 2017) and the ERAD machinery (Yanagitani et al., 2009, 2011) have been reported, supporting the idea that there are distinct ER subdomains containing specific IRE1 $\alpha$ -containing protein complexes. Moreover, IRE1 $\alpha$  interacts with many proteins through adaptors that can physically bind to other signaling proteins. In the next three sections, we discuss the identification of different components of the UPRosome and their significance to the regulation and function of the UPR. We divide the discussion into three different categories: inhibitors, positive modulators and post-translational modifiers (see also Table 1 and Fig. 2).

### Cytosolic IRE1 $\alpha$ inhibitors

We previously identified Bax inhibitor-1 (BI-1, also known as TMBIM6) as the first negative regulator of IRE1 $\alpha$  signaling that associated with its cytosolic domain (Lisbona et al., 2009). This interaction was also shown to be important to regulate IRE1 $\alpha$  function in models of ischemia, diabetes and liver steatosis (Baillly-Maitre et al., 2010, 2006; Lebeauupin et al., 2018). Another negative regulator of IRE1 $\alpha$  signaling is fortilin (also known as TPT1), which can directly interact and inhibit both the kinase and RNase domains, protecting cells from ER stress-induced apoptosis (Pinkaw et al., 2017). Fortilin preferentially binds to phosphorylated and active IRE1 $\alpha$ , modulating the attenuation phase under prolonged ER stress (Pinkaw et al., 2017). A recent report showed that the BH3-only protein BID also negatively regulates the RNase activity of IRE1 $\alpha$  (Bashir and Majid Fazili, 2019 preprint). A common feature of the negative regulators of IRE1 $\alpha$  is that they block its sustained activation, disabling the capacity to engage apoptotic programs under chronic ER stress (Fig. 2A).

### Positive modulators of IRE1 $\alpha$

The enhancement of IRE1 $\alpha$  signaling by positive regulators is highly complex as these proteins can control several steps of IRE1 $\alpha$  activation and signaling (Hetz et al., 2020) (Fig. 2B). The first identified enhancer of IRE1 $\alpha$  signaling was the protein tyrosine phosphatase 1B (PTP-1B; also known as PTPN1) (Gu et al., 2004). PTP-1B promotes *XBPI* mRNA splicing and JNK activation under ER stress, but not PERK signaling (Gu et al., 2004). However, a physical interaction between IRE1 $\alpha$  and PTP-1B has not been reported.

We identified the first direct enhancers of IRE1 $\alpha$  signaling as the pro-apoptotic BCL-2 family members BAX and BAK (also known as BAK1), two crucial components of the cell death machinery (Hetz et al., 2006a). BAX and BAK locate to the ER and fine-tune IRE1 $\alpha$  activation and the amplitude of its signaling under ER stress. Similarly, two other BCL-2 family members, the BH3-only proteins BIM (BCL2L11) and PUMA (BBC3), have been described to repress the attenuation phase of IRE1 $\alpha$  to sustain its signaling (Rodriguez et al., 2012). Thus, one possible scenario is that BAX and/or BAK might facilitate IRE1 $\alpha$  dimer formation in the activation phase,



Table 1. Possible components of the UPRosome

| Protein                    | Methods used       | Experiment description |                |                 |                |               |             |        | ER stress | Others                                                          | References |
|----------------------------|--------------------|------------------------|----------------|-----------------|----------------|---------------|-------------|--------|-----------|-----------------------------------------------------------------|------------|
|                            |                    | Endo-genous            | Over expressed | Detection       |                |               | Interaction |        |           |                                                                 |            |
|                            |                    |                        |                | <i>In vitro</i> | <i>In vivo</i> | Cell type     | ER          | Others |           |                                                                 |            |
| <b>Activity modifiers</b>  |                    |                        |                |                 |                |               |             |        |           |                                                                 |            |
| <b>Positive modifiers</b>  |                    |                        |                |                 |                |               |             |        |           |                                                                 |            |
| ABL1                       | IP                 | ×                      | ✓              | ×               | ×              | INS-1         | –           | –      |           | Morita et al., 2017                                             |            |
| BAK                        | PD-IP              | ✓                      | ✓              | ✓               | ×              | MEF           | ▲           | –      |           | Hetz et al., 2006                                               |            |
| BAX                        | PD-IP              | ✓                      | ✓              | ✓               | ×              | MEF           | ▲           | –      |           | Hetz et al., 2006                                               |            |
| PUMA                       | IPMS-PD-Y2H        | ✓                      | ✓              | ✓               | ×              | MEF/HEK       | ▲           | –      |           | Rodriguez et al., 2012                                          |            |
| BIM                        | IPMS-PD-Y2H        | ✓                      | ✓              | ✓               | ×              | MEF/HEK       | ▲           | –      |           | Rodriguez et al., 2012                                          |            |
| DAB2IP                     | IP                 | ✓                      | ✓              | ✓               | ×              | EC            | ▲           | –      |           | Luo et al., 2008                                                |            |
| ER PTC                     | PAR-CLIP-IPMS      | –                      | –              | –               | –              | HEK           | ▲           | 415    |           | Acosta-Alvear et al., 2018                                      |            |
| HSP47                      | IPMS-PLA-IP-PD-MST | ✓                      | ✓              | ✓               | ×              | MEF/HEK       | ▲           | 8      |           | Sepulveda et al., 2018                                          |            |
| HSP90AA1                   | IP                 | ✓                      | ✓              | ×               | ×              | COS-7/INS-1   | =           | –      |           | Marcu et al., 2002; Ota and Wang, 2012                          |            |
| HSP72                      | IP-PD              | ×                      | ✓              | ✓               | ×              | PC12          | =           | –      |           | Gupta et al., 2010                                              |            |
| JAB1                       | Y2H-IP-PD-CL       | ×                      | ✓              | ×               | ×              | HEK           | ▼           | –      |           | Oono et al., 2004                                               |            |
| NMIIB                      | IPMS-IP            | ×                      | ✓              | ×               | ×              | HEK           | ▲           | –      |           | He et al., 2012                                                 |            |
| NMI                        | MAPPIT-IP          | ×                      | ✓              | ×               | ×              | HEK           | –           | 5      |           | Brozzi et al., 2014                                             |            |
| PRKCSH                     | IP-PD              | ✓                      | ×              | ✓               | ×              | LO2           | ▲           | –      |           | Shin et al., 2019                                               |            |
| PTP1B                      | N.T.               | –                      | –              | –               | ×              | MEF           | –           | –      |           | Gu et al., 2004                                                 |            |
| RIPK1                      | IP                 | ×                      | ✓              | ×               | ×              | HEK           | –           | –      |           | Estornes et al., 2014                                           |            |
| RNF13                      | IP                 | ×                      | ✓              | ×               | ×              | HEK           | –           | –      |           | Arshad et al., 2013                                             |            |
| RNH1                       | IPMS-PLA           | ✓                      | –              | ×               | ×              | HK-2          | ▲           | –      |           | Tavernier et al., 2018                                          |            |
| RTCB                       | IP                 | ✓                      | ✓              | ✓               | ×              | HEK           | –           | –      |           | Jurkin et al., 2014; Kosmaczewski et al., 2014                  |            |
| Sec61                      | IPMS-IP            | ×                      | ✓              | ✓               | ×              | HEK           | =           | –      |           | Plumb et al., 2015; Sundaram et al., 2017                       |            |
| TAOK3                      | Y2H-IP             | ×                      | ✓              | ×               | ×              | HEK           | ▲           | –      |           | Yoneda et al., 2001                                             |            |
| TRAF2-6                    | IP                 | ✓                      | ✓              | ×               | ×              | PM HEK        | –           | 3      |           | Nishitoh et al., 2002                                           |            |
| UBD                        | MAPPIT             | ✓                      | –              | ×               | ×              | HEK βH1 cells | –           | 5      |           | Brozzi et al., 2016                                             |            |
| YIPF5                      | IP                 | ✓                      | –              | ×               | ×              | HeLa          | –           | 5      |           | Taguchi et al., 2015                                            |            |
| <b>Inhibitors</b>          |                    |                        |                |                 |                |               |             |        |           |                                                                 |            |
| Bi-1                       | IP-PD              | ✓                      | ✓              | ✓               | ×              | MEF HEK       | =           | –      |           | Lisbona et al., 2009                                            |            |
| BiD                        | PD-Y2H             | ×                      | ✓              | ✓               | ×              | HEK           | –           | –      |           | Bashir and Majid Fazili, 2019                                   |            |
| Fortilin                   | PLA-IP-BLI         | ✓                      | –              | ✓               | ×              | PC3           | ▲           | –      |           | Pinkaw et al., 2017                                             |            |
| BiP                        | IP-PD-MST          | ✓                      | ✓              | ✓               | ×              | AT42J HEK     | ▼           | –      |           | Bertolotti et al., 2000 and many others                         |            |
| PDIA6                      | IP/MST             | ✓                      | ✓              | ✓               | ×              | HEK           | ▼           | –      |           | Eletto et al., 2014; Groenendyk et al., 2014                    |            |
| PDI                        | IP-PD              | ✓                      | ✓              | ✓               | ×              | HepG2         | ▲           | –      |           | Yu et al., 2020                                                 |            |
| <b>PTM modifiers</b>       |                    |                        |                |                 |                |               |             |        |           |                                                                 |            |
| <b>Positive modulators</b> |                    |                        |                |                 |                |               |             |        |           |                                                                 |            |
| CHIP                       | IPMS               | ✓                      | ✓              | ×               | ×              | HEK           | –           | 4      |           | Zhu et al., 2014                                                |            |
| PARP16                     | IP                 | ×                      | ✓              | ×               | ×              | Hela          | =           | –      |           | Jwa and Chang, 2012                                             |            |
| PSEN1                      | IP                 | ×                      | ✓              | ×               | ×              | SK-N-SH       | –           | –      |           | Katayama et al., 1999                                           |            |
| PKA                        | N.T.               | –                      | –              | –               | –              | Hepatocytes   | –           | –      |           | Mao et al., 2011                                                |            |
| <b>Inhibitors</b>          |                    |                        |                |                 |                |               |             |        |           |                                                                 |            |
| Caspases                   | N.T.               | –                      | –              | –               | –              | KMS11/OPM2    | –           | –      |           | Shemorry et al., 2019                                           |            |
| PPM1I                      | IPMS               | ×                      | ✓              | ×               | ×              | INS-1         | ▲           | 6      |           | Lu et al., 2013                                                 |            |
| RACK1                      | IP                 | ✓                      | –              | ×               | ×              | INS-1 HEPG2   | ▲           | –      |           | Qiu et al., 2010                                                |            |
| RPAP2                      | IP                 | ×                      | ✓              | ×               | ×              | OVCAR8        | –           | –      |           | Chang et al., 2018                                              |            |
| SEL1L                      | IP                 | ×                      | ✓              | ×               | ×              | HEK           | ▼           | OS9    |           | Sun et al., 2015                                                |            |
| MITOL                      | IP-PD              | ✓                      | ✓              | ×               | ×              | HEK           | –           | –      |           | Takeda et al., 2019                                             |            |
| <b>Protein stability</b>   |                    |                        |                |                 |                |               |             |        |           |                                                                 |            |
| DDRGK1                     | IP                 | ×                      | ✓              | ×               | ×              | HEK           | ▲           | UFM1   |           | Liu et al., 2017                                                |            |
| OPTN                       | IP                 | ✓                      | –              | ×               | ✓              | MODE HT29     | =           | –      |           | Tschurtschenthaler et al., 2017                                 |            |
| SIGMAR1                    | IP                 | ×                      | ✓              | ✓               | ×              | CHO           | –           | –      |           | Mori et al., 2013                                               |            |
| SYVN1                      | IP                 | ✓                      | ✓              | ×               | ×              | HEK HCT116    | ▲           | p53    |           | Gao et al., 2008; Sun et al., 2015                              |            |
| USP14                      | Y2H-IP             | ✓                      | ✓              | ×               | ×              | MEF HEK PC    | ▼           | –      |           | Nagai et al., 2009                                              |            |
| <b>Novel functions</b>     |                    |                        |                |                 |                |               |             |        |           |                                                                 |            |
| FLNA                       | Y2H-IP-PD-CL       | ✓                      | ✓              | ✓               | ×              | MEF HEK       | ▲           | 70     |           | Urta et al., 2018; Tavernier et al., 2018; Augusto et al., 2020 |            |
| ITPR1–ITPR3                | IP-PLA-PD          | ×                      | ✓              | ✓               | ×              | MEF HEK       | –           | –      |           | Carreras-Sureda et al., 2019                                    |            |

The table indicates different IRE1 $\alpha$ -binding partners identified with different approaches. Methods used indicates the technique used to determine the interaction including immunoprecipitation (IP), pull-down (PD), immunoprecipitation followed by mass spectrometry (IPMS), yeast two hybrid (Y2H), proximity ligation assay (PLA), mammalian protein–protein interaction trap (MAPPIT), microscale thermophoresis (MST), bio-Layer interferometry (BLI), photoactivatable ribonucleoside enhanced cross-linking and immunoprecipitation (PAR-CLIP) and co-localization (CL). N.T., not tested; PTM, post-translational modifications; ER PTC, ER protein targeting components; ×, no positive interaction detected; ✓, interaction detected; ▲, upregulation; ▼, downregulation; =, no changes observed. The number of the other IRE1 $\alpha$ -binding proteins described is also indicated (Others) and these are listed in Table S1.

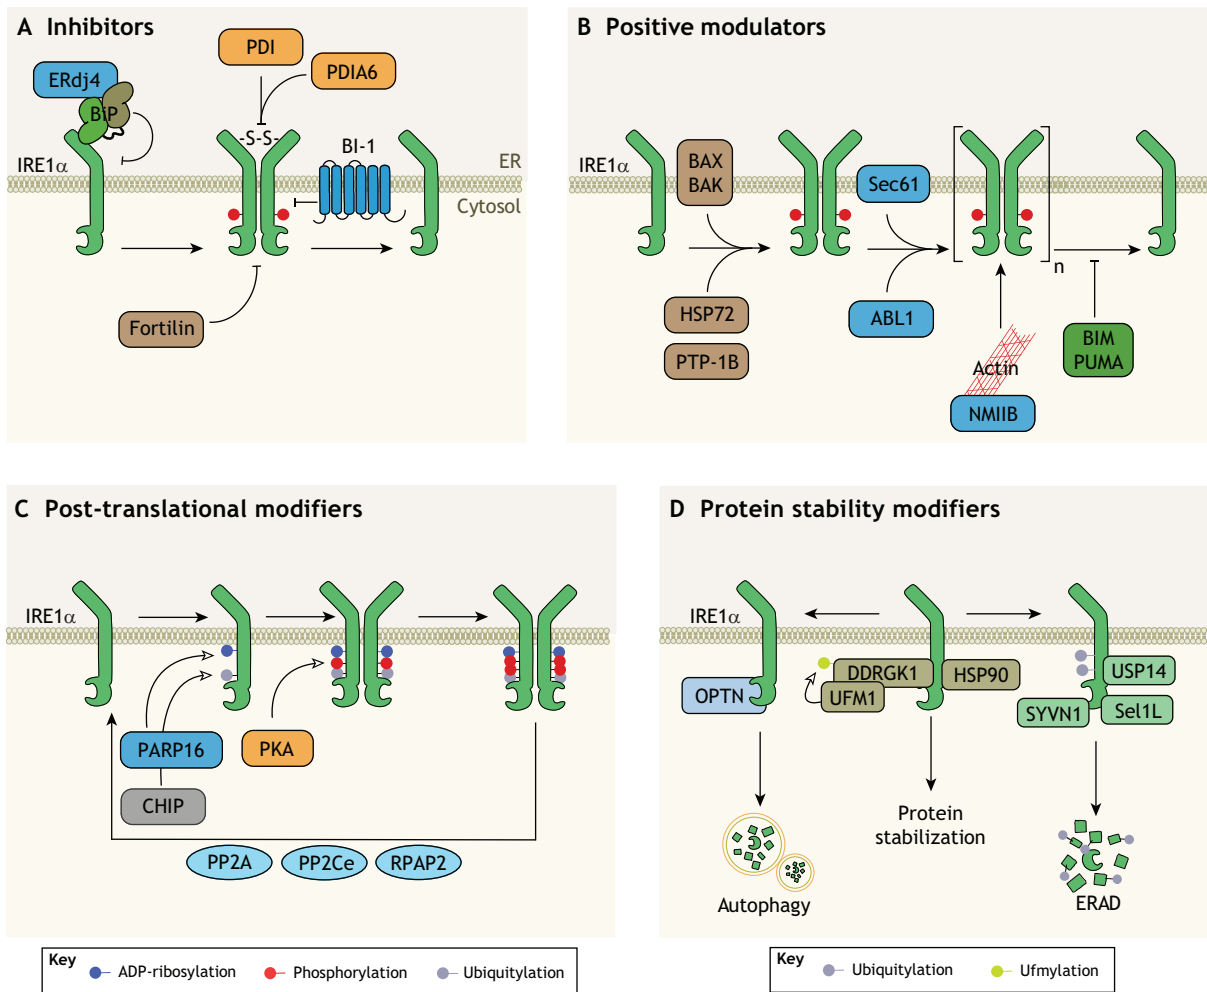

**Fig. 2. Function of UPRosome components in IRE1 $\alpha$  signaling.** The activity of IRE1 $\alpha$  is fine-tuned by several proteins that interact with it, forming a complex multiprotein platform referred to as the UPRosome. IRE1 $\alpha$ -interacting proteins can be divided into several groups as shown in A–D. (A) Inhibitors of IRE1 $\alpha$  signaling. Inhibitors such as BI-1 and fortilin, specifically decrease IRE1 $\alpha$  signaling. In addition, PDIA6 and PDI can also inhibit IRE1 $\alpha$  activity by interacting and regulating the oxidation status of IRE1 $\alpha$ . (B) Positive regulators of IRE1 $\alpha$  signaling. Several components of the BCL-2 family can control the balance between monomers and oligomers, such as BAX, BAK, BIM and PUMA. Sec61, ABL1 and NMIIB have also been described as specific inducers of IRE1 $\alpha$  oligomers. In addition, components, such as HSP72 and PTP-1B, can specifically induce IRE1 $\alpha$  activation upon ER stress. (C) Post-translational modifiers that affect the activation status of IRE1 $\alpha$ . Besides IRE1 $\alpha$  auto-transphosphorylation, PKA can also induce IRE1 $\alpha$  phosphorylation at serine 752, inducing its activity. The balance between phosphorylated and total IRE1 $\alpha$  is tightly regulated by several phosphatases, including RPAP2, PP2A and PP2Ce. In addition, IRE1 $\alpha$  can also be ADP-ribosylated (PARP16) or ubiquitylated (CHIP), regulating the amplitude of activation. (D) Protein stability modifiers that alter IRE1 $\alpha$  protein levels. Several proteins, such as HSP90 and UFM1, can regulate IRE1 $\alpha$  protein stability. In addition, IRE1 $\alpha$  can be targeted to autophagy through OPTN or degraded through ERAD by USP14, Sel1 L or SYVN1.

whereas BH3-only proteins stabilize IRE1 $\alpha$  dimers and/or oligomers during the attenuation phase after prolonged ER stress.

IRE1 $\alpha$  oligomerization can be also regulated by specific factors. For instance, the non-muscle myosin heavy chain IIB (NMIIB) protein stabilizes the formation of IRE1 $\alpha$  oligomers (He et al., 2012). In agreement with this finding, drugs that destabilize the actin cytoskeleton decrease IRE1 $\alpha$  activation and cluster formation in mammalian and yeast cells (He et al., 2012; Ishiwata-Kimata et al., 2013). Remarkably, ER stress induction leads to the phosphorylation and activation of two important regulators of the actin cytoskeleton, the myosin regulatory light chain (RLC), a crucial activator of NMIIB (He et al., 2012), and filamin A (Urra et al., 2018), supporting the idea of an actin cytoskeleton crosstalk with the UPR. It has been also described that the tyrosine protein kinase ABL1 interacts with IRE1 $\alpha$  and stabilizes the formation of oligomers, which may favor IRE1 $\alpha$  RNase activation towards RIDD (Dufey et al., 2020; Morita et al., 2017). Finally, Yip1A (also known as YIPF5) regulates IRE1 $\alpha$  auto-

transphosphorylation and the formation of oligomers (Taguchi et al., 2015).

Sec61, a core component of the translocon, forms a complex with IRE1 $\alpha$  at the ER membrane, recruiting the unspliced XBP1 (XBP1u) through a pseudo-transmembrane domain present in the nascent protein chain (Plumb et al., 2015). The close proximity between XBP1u and the IRE1 $\alpha$ –Sec61 complex is crucial to optimize the *XBP1* mRNA splicing process (Plumb et al., 2015). Other studies have suggested that the interaction between Sec61 and IRE1 $\alpha$  maintains the balance between dimers and oligomers (Sundaram et al., 2017). In addition, this protein complex was also found in an unbiased interactome, showing that IRE1 $\alpha$  binds to several proteins and ribosomal RNAs that are part of the signal recognition particle (SRP) and the ribosome (Acosta-Alvear et al., 2018), indicating that IRE1 $\alpha$  is in close proximity with the ER protein translocation and targeting machineries. Recently, the protein kinase C substrate 80K-H (PRKCSH) was shown to physically interact with IRE1 $\alpha$ , promoting

its phosphorylation and oligomerization under ER stress (Shin et al., 2019). Taken together, this evidence indicates that different factors tune the balance between IRE1 $\alpha$  dimers and oligomers to determine the amplitude and kinetics of UPR signaling.

### Post-translational modifiers of IRE1 $\alpha$ signaling

Auto-transphosphorylation of IRE1 $\alpha$  is a key event required for the activation of the RNase domain. Several phosphorylation sites have been identified in the cytosolic domain of human IRE1 $\alpha$ , including serine residues 551 and 562 in the linker region, serine residues 724, 726 and 729 in the kinase activation loop, and threonine 973 in the C-terminal RNase domain (Prischi et al., 2014), whereas the phosphorylation in the serine residues located in the kinase domain are crucial for IRE1 $\alpha$  RNase activation (Prischi et al., 2014). Homologous serine phosphorylation sites have also been described in yeast (Armstrong et al., 2017). Interestingly, the phosphorylation at serine 729 has been associated with the selective increase in RIDD activity in XBP1-deficient B cells (Tang et al., 2018).

Protein kinase A (PKA) has been suggested to directly phosphorylate serine 724 to enhance IRE1 $\alpha$  signaling after fasting or glucagon stimulation (Mao et al., 2011). Similarly, in the brain, the activation of IRE1 $\alpha$  by brain-derived growth factor (BDNF) (Martinez et al., 2016) is also mediated by PKA activation downstream of its receptor (Saito et al., 2018). Three phosphatases dephosphorylate IRE1 $\alpha$  in different contexts. For instance, the association of the receptor for activated C kinase 1 (RACK1) to IRE1 $\alpha$  recruits the phosphatase PP2A to the complex after glucose stimulation to sustain UPR signaling (Qiu et al., 2010). In addition, the ER-located phosphatase PP2Ce (also known as PPM1L) dephosphorylates IRE1 $\alpha$  in the context of metabolic lipid control (Lu et al., 2013). Interestingly, in a siRNA screen targeting 273 human phosphatases, the RNA polymerase II-associated protein 2 (RPAP2) was found to de-phosphorylate IRE1 $\alpha$  (Chang et al., 2018). Hence, the regulation of the phosphorylation status of IRE1 $\alpha$  is another key step fine tuning its signaling.

Additional post-translational modifications also modulate IRE1 $\alpha$  signaling (Fig. 2C). IRE1 $\alpha$  can be ADP-ribosylated under ER stress by the poly(ADP-ribose) polymerase 16 (PARP16), an event that is required for their full activation (Jwa and Chang, 2012). In addition, ubiquitylation of IRE1 $\alpha$  at lysine residues 545 and 828 by the E3 ligase CHIP (also known as STUB1) regulates the phosphorylation status of IRE1 $\alpha$  (Zhu et al., 2014). The E3 ligase MITOL (also known as MARCHF5) ubiquitylates IRE1 $\alpha$  at lysine 481, inhibiting its signaling under prolonged ER stress (Takeda et al., 2019). S-nitrosylation of IRE1 $\alpha$  at two conserved cysteine residues located in the RNase domain also attenuates its activity under metabolic stress and neurodegeneration (Nakato et al., 2015; Wang et al., 2018a; Yang et al., 2015).

Another important step modulating IRE1 $\alpha$  signaling is the control of its stability (Fig. 2D). The E3 ubiquitin ligase synoviolin (SYVN1) ubiquitylates IRE1 $\alpha$  to induce its degradation (Gao et al., 2008; Sun et al., 2015). Interestingly, ubiquitin D (UBD) can associate with IRE1 $\alpha$ , impacting JNK signaling (Brozzi et al., 2016). Furthermore, DDRGK domain containing 1 (DDRGK1), a component of the ubiquitin-fold modifier 1 (Ufm1) system, interacts with and regulates IRE1 $\alpha$  protein stability by inducing its ufmylation through a non-covalent modification (Liu et al., 2017). IRE1 $\alpha$  can also be targeted to ERAD by USP14 (Nagai et al., 2009), or to the autophagy pathway by optineurin (Tschurtschenthaler et al., 2017). In addition, HSP90 can stabilize IRE1 $\alpha$  by interacting with its cytosolic domain (Marcu et al., 2002; Ota and Wang, 2012). Interestingly, IRE1 $\alpha$  can also be cleaved by caspases in some cancer models, resulting in the generation of a fragment that can inhibit cell

death (Shemorry et al., 2019). Altogether, these reports suggest that many different factors tune IRE1 $\alpha$  signaling at multiple levels.

Finally, although the UPosome concept was originally conceived exclusively for IRE1 $\alpha$  regulation (Hetz and Glimcher, 2009), recent studies have shown that ATF6 and PERK can be also modulated by specific interacting proteins (reviewed in Hetz et al., 2020). Thus, the concept of the UPosome could be extended to PERK and ATF6.

### IRE1 $\alpha$ as a signaling platform – novel physiological outputs

Most of the studies in the field have addressed the biological function of IRE1 $\alpha$  in the control of transcription and translation through XBPs or RIDD, impacting multiple cellular processes (reviewed in Oakes and Papa, 2015; Wang and Kaufman, 2016). However, recent findings have pointed to novel functions executed through alternative signaling pathways (Fig. 3).

Two recent examples from our group have revealed that IRE1 $\alpha$  influences cell physiology by acting as a scaffold protein, independently of its enzymatic activities (see below) (Carreras-Sureda et al., 2019; Urrea et al., 2018). To further decode possible new IRE1 $\alpha$  functions, here, we performed an extensive analysis of almost 40 IRE1 $\alpha$ -binding partners reported in the literature (Table 1), followed by a gene ontology (GO) analysis and functional clustering. In addition, we also included other IRE1 $\alpha$ -binding proteins presented in data sets available from different public interactome screenings (Acosta-Alvear et al., 2018; Urrea et al., 2018) (Table S1). This comparison revealed eight common UPosome components in at least two data sets (Fig. 3A). Furthermore, our GO analyses of all the 495 proteins identified showed that almost all significant associations fall into 20 different biological processes (Table S2). This functional analysis can be further minimized to five major clusters of proteins involved in cell cycle, cytoskeleton regulation, protein targeting, ribosome biogenesis and protein translation (Table S2). In the next sections, we discuss available evidence that suggests the involvement of IRE1 $\alpha$  in different biological processes by IRE1 $\alpha$  through the interaction with specific factors.

### IRE1 $\alpha$ and cell death programs

A number of studies support a direct molecular connection between IRE1 $\alpha$  and several signaling pathways regulating cell death. For instance, binding of IRE1 $\alpha$  to SH2/SH3-containing adaptor protein Nck can modulate p38 MAPK family and ERK1 (MAPK3) signaling, impacting cell survival (Nguyen et al., 2004). In addition, IRE1 $\alpha$  can enhance the activation of NF- $\kappa$ B by interacting with TRAF2 and the inhibitor of nuclear factor  $\kappa$ B kinase (IKK), promoting cell death (Hu et al., 2006). Remarkably, the IRE1 $\alpha$ -TRAF2 interaction also triggers the activation of the apoptosis signal-regulating kinase 1 (ASK1) and Jun-N terminal kinase (JNK) pathway (Nishitoh et al., 2002; Urano et al., 2000). The IRE1 $\alpha$ -MAPK signaling branch is also modulated by other components of the UPosome, such as AIP1 (Luo et al., 2008), RNF13 (Arshad et al., 2013), UBD (Brozzi et al., 2016), BI-1 (Castillo et al., 2011) and N-Myc interactor (Brozzi et al., 2014). However, the mechanisms of JNK activation downstream of IRE1 $\alpha$  and its consequences for cell fate under ER stress are not completely understood.

Our GO enrichment analyses and functional clustering revealed a group of IRE1 $\alpha$ -binding partners that are involved in apoptosis, including pro-apoptotic proteins of the BCL-2 family (BAX, BAK, BIM and PUMA),  $\alpha$ -catenin and BI-1 (Fig. 3B). We speculate that this association may represent a molecular interface to monitor alterations in proteostasis and engage cell death programs when cell damage is deemed irreversible.

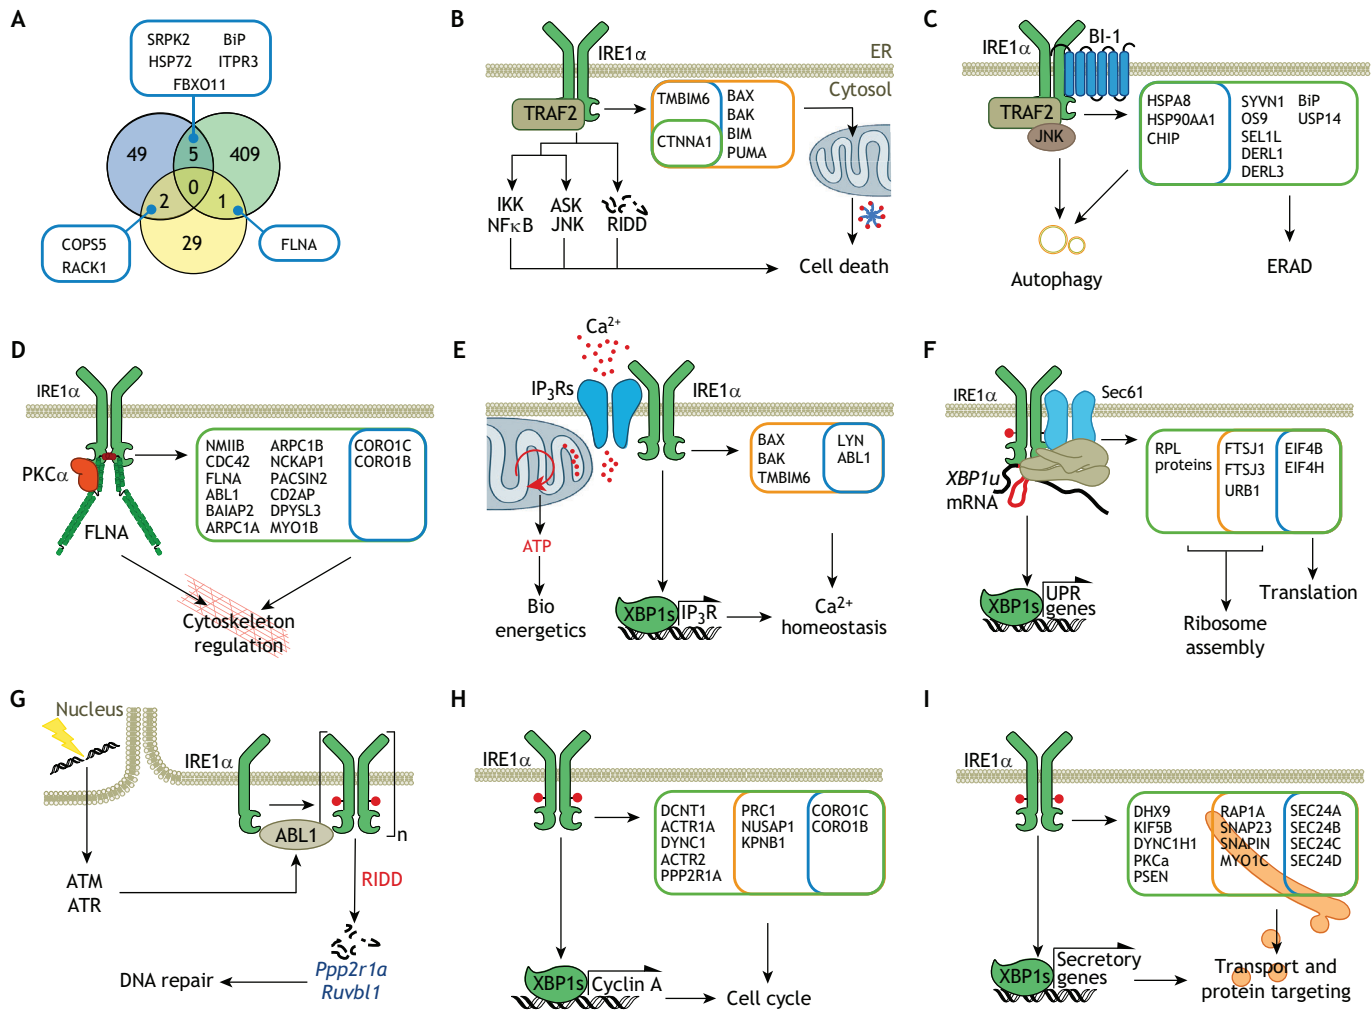

**Fig. 3. Possible novel outputs of the IRE1 $\alpha$  UPRosome.** (A) Venn diagram comparing the composition of all UPRosome proteins described in global references listed in Table 1 (56 proteins; blue circle), and two available screens using either yeast two-hybrid [32 proteins (index score >4); yellow circle; Urrea et al., 2018] and immunoprecipitation followed by mass-spectrometry analysis [405 proteins ( $P>0.01$ ); green circle; Acosta-Alvear et al., 2018]. Gene ontology (GO) analysis and functional clustering of all IRE1 $\alpha$ -binding proteins was performed (see Table S2). (B) Cell death. IRE1 $\alpha$  regulates the cell death process through multiple mechanisms that involve NF $\kappa$ B, JNK and RIDD. Our GO analysis also indicates that IRE1 $\alpha$  interacts with clusters of proteins involved in cell death such as components of the BCL-2 family (BAX, BAK, BIM and PUMA), and Bi-1 (TMBIM6) or  $\alpha$ -catenin (CTNNA1), which can also be crucial components of the cell death machinery. (C) Protein degradation pathways. IRE1 $\alpha$  associates with TRAF2 and Bi-1/TMBIM6 to regulate JNK activation and autophagy (HSPA8, HSP90AA1 and CHIP) or components of the ERAD pathway, among them SYVN1, USP14, the DERL1 family and SEL1L. Also, IRE1 $\alpha$  interacts with OS9 and BiP, which also have been described to target proteins for degradation. (D) Cytoskeleton regulation. We have previously described that IRE1 $\alpha$  regulates actin cytoskeleton through FLNA interaction. Here, we found that IRE1 $\alpha$  also interacts with a cluster of proteins that are part of or regulate the cytoskeleton such as CORO1B and CORO1C, ARPC1A and ARPC1B, NMIIB, CDC42 and MYO1B. In addition, IRE1 $\alpha$  binds to other proteins that can indirectly regulate the cytoskeleton, such as ABL1, BAIAP2, NCKAP1 and DPSYSL3. (E) Ca<sup>2+</sup> homeostasis. IRE1 $\alpha$  location at mitochondria-associated membranes (MAMs) regulates the docking of the IP3Rs (ITPR1, ITPR2 or ITPR3) at this subcompartment, promoting Ca<sup>2+</sup> release from the ER. This mechanism enhances the transfer of Ca<sup>2+</sup> to the mitochondrial matrix, promoting ATP production to tune bioenergetics. Our GO analysis reveals that IRE1 $\alpha$  could affect this process by interacting with other proteins such as BAX, BAX and Bi-1/TMBIM6 or through ABL1 and LYN. (F) Translation and ribosome function. IRE1 $\alpha$  interacts with SEC61, keeping it in close proximity to all ribosome components. We postulate that IRE1 $\alpha$  can interact with several ribosomal proteins (RPL proteins) and ribosome assembly proteins such as FTSJ1–FTSJ3 and URB1. In addition, IRE1 $\alpha$  can bind to proteins involved in translation such as EIF4B–EIF4H. (G) DNA damage response. We recently described that upon DNA damage, IRE1 $\alpha$  is specifically activated to induce the degradation of mRNAs (*Ppp2r1a* and *Ruvbl1*) through regulated IRE1 $\alpha$ -dependent decay (RIDD), sustaining DNA repair and promoting survival. The molecular mechanism involves that downstream of ATM and ATR; ABL1 interacts with IRE1 $\alpha$  promoting its oligomerization and RIDD. (H) Cell cycle control. It is known that IRE1 $\alpha$  can regulate cyclin A expression through XBP1s promoting cell cycle progression. Our GO analysis reveals that IRE1 $\alpha$  specifically binds to components that regulate cytokinesis such as CORO1B and CORO1C, PRC1, NUSAP1 and KPNB1. Also, IRE1 $\alpha$  interacts with several proteins that can indirectly regulate cell cycle such as DCNT1, ACTR1A and PPP2R1A. (I) Vesicle transport and protein targeting. IRE1 $\alpha$  can regulate the expression of secretory genes through XBP1s. We also indicate that IRE1 $\alpha$  can affect vesicle transport through several other proteins such as the SEC24 family or components of vesicle formation and transport, such as SNAP23, SNAPIN and MYO1C. In addition, this process can be further modulated by other proteins including KIF5B, PKA, PSEN and DHX9. See Table S1 for the full names of proteins included here.

**IRE1 $\alpha$  and protein degradation pathways**

One of the outputs of UPR activation under ER stress is the engagement of the autophagy and ERAD pathways, contributing

to stress mitigation (Rashid et al., 2015). The interplay between autophagy and the UPR affects the progression of several human diseases, such as neurodegenerative diseases (Hetz et al., 2009;



Vidal et al., 2012), cancer (Hart et al., 2012) and auditory loss (Kishino et al., 2017). Interestingly, the formation of the IRE1 $\alpha$ –TRAF2 complex can also induce autophagy in a JNK-dependent manner (Castillo et al., 2011). Indeed, JNK activation mediates the phosphorylation of BCL-2 (Patingre et al., 2009); this disrupts the Beclin-1–BCL-2 complex, facilitating phagosome initiation and autophagy (Patingre et al., 2005). The IRE1 $\alpha$ –TRAF2 interaction can be further modulated by BI-1, displacing TRAF2 from the complex, blocking autophagy flux (Castillo et al., 2011).

Our GO analysis indicates that IRE1 $\alpha$  interacts with three proteins involved in targeting substrates to chaperone-mediated autophagy (CMA) – HSPA8, HSP90AA1 and STUB1 (Kaushik et al., 2011). IRE1 $\alpha$  also associates with factors involved in ERAD, including SYVN1, a crucial E3 ubiquitin-protein ligase of the ERAD pathway, DERL1 and DERL3, proteins regulating the retrotranslocation of misfolded proteins to the cytosol, and the proteasome-associated deubiquitylase USP14, which controls the ubiquitylation status of proteasome-targeted proteins (Fig. 3C). Hence, IRE1 $\alpha$  interacts with components of autophagy and ERAD machineries, suggesting that IRE1 $\alpha$  could be involved in the regulation of these pathways.

#### Regulation of the actin cytoskeleton

Using a yeast two-hybrid screen, we recently identified almost 70 candidate proteins that might directly bind to the cytosolic region of IRE1 $\alpha$ , where filamin A was the strongest hit (Urrea et al., 2018). Filamin A was also validated as a strong IRE1 $\alpha$  interactor in a second unbiased screen (Tavernier et al., 2018) and, in addition, in a recent study (Augusto et al., 2020). Filamin A is an actin-filament-crosslinking protein that regulates cytoskeleton dynamics, impacting different processes, such as cell migration, adhesion and mechanotransduction (Kim and McCulloch, 2011; Lynch and Sheetz, 2011). We showed that IRE1 $\alpha$  acts as a scaffold to recruit filamin A to the ER membrane and facilitate its phosphorylation to modulate cytoskeleton dynamics (Urrea et al., 2018; Fig. 3D). In this model, PKC $\alpha$  mediates the phosphorylation of many filamin A proteins at serine 2152 in an IRE1 $\alpha$ -dependent manner (Urrea et al., 2018).

The interaction between IRE1 $\alpha$  and filamin A requires a proline-rich domain located at the distal C-terminal region of IRE1 $\alpha$  (Urrea et al., 2018). Interestingly, disruption of this domain does not affect *XBP1* mRNA splicing, whereas it selectively inhibits the regulation of the actin cytoskeleton, fully separating both cellular functions (Urrea et al., 2018). *In vivo* studies demonstrated that IRE1 $\alpha$  ablation decreases cortical neuronal migration in the mouse brain (Urrea et al., 2018). Since filamin A mutations in humans are the main cause of periventricular nodular heterotopia (PVNH), a genetic disorder characterized by abnormal neuronal migration (Fox et al., 1998; Sarkisian et al., 2008), we speculate that IRE1 $\alpha$  loss of function might contribute to PVNH as reported for other filamin A regulators (Sarkisian et al., 2008; Zhou et al., 2010). Recently, it has been reported that the IRE1 $\alpha$  and FLNA interaction is also implicated in the migration of cells infected with intracellular parasites (Augusto et al., 2020).

According to our GO analysis, IRE1 $\alpha$  interacts with other actin-binding proteins such as CORO1B and CORO1C, which are involved in actin remodeling and lamellipodia formation in the migrating leading edge (Cai et al., 2007) and in ER-associated endosome fission (Hoyer et al., 2018) (Fig. 3D). In addition, we found an important cluster of regulators of actin and microtubule dynamics, suggesting that IRE1 $\alpha$  may affect cytoskeleton remodeling through several mechanisms.

#### Reprogramming cell metabolism by IRE1 $\alpha$ through Ca<sup>2+</sup> signaling

IRE1 $\alpha$  and PERK have been reported to be enriched at the ER–mitochondrial contact sites (termed mitochondria-associated membranes; MAMs) (Carreras-Sureda et al., 2019; Mori et al., 2013; van Vliet et al., 2017). It was suggested that the specific localization of UPR stress sensors at this ER membrane subdomain set the threshold for UPR activation (Mori et al., 2013). However, the actual role of the IRE1 $\alpha$  pool located at MAMs in mitochondrial physiology was not defined until very recently. Under ER stress, the inositol-1,4,5-trisphosphate receptors (IP<sub>3</sub>Rs) trigger the exit of Ca<sup>2+</sup> from the ER to the cytosol, regulating autophagy and apoptosis (Kiviluoto et al., 2013). ER Ca<sup>2+</sup> release is pivotal to tune mitochondrial function to produce ATP, because different enzymes of the tricarboxylic acid cycle (TCA) are Ca<sup>2+</sup> dependent (Giorgi et al., 2018). The ER-to-mitochondria Ca<sup>2+</sup> transfer process requires local microdomains of high Ca<sup>2+</sup> concentrations to be efficient (Csordás et al., 2010; Giacomello et al., 2010). We recently reported a novel function of IRE1 $\alpha$  in sustaining ER–mitochondrial communication and bioenergetics by demonstrating that IRE1 $\alpha$  regulates the distribution of IP<sub>3</sub>Rs at MAMs through a direct interaction (Carreras-Sureda et al., 2019). IRE1 $\alpha$  localization at MAMs recruits and docks IP<sub>3</sub>Rs, improving mitochondria calcium transfer to burst energy metabolism. In addition, besides IP<sub>3</sub>R localization, IRE1 $\alpha$  expression alters the protein composition of MAMs (Fig. 3E). The GO analysis also suggested that IRE1 $\alpha$  interacts with other proteins that can regulate calcium homeostasis, such as BAX, BAK and BI-1 (Fig. 3E).

#### Ribosomes and the translocation machinery

As discussed above, the *XBP1u* mRNA is recruited to the ER by the formation of a complex between IRE1 $\alpha$  and Sec61 (Plumb et al., 2015). However, the mechanisms explaining how RIDD substrates are made available to the ER membrane are still unknown. Using photoactivatable ribonucleoside crosslinking and immunoprecipitation (PAR-CLIP), it was shown that IRE1 $\alpha$  is part of a large complex containing almost 400 different RNAs, including mRNAs, ncRNA and rRNA (Acosta-Alvear et al., 2018). Furthermore, IRE1 $\alpha$  interacts with the exposed surface of translating ribosomes, and with components of the SRP and translocon (Acosta-Alvear et al., 2018). Therefore, IRE1 $\alpha$  could function as a scaffold to recruit and maintain the protein targeting and translation machineries in close proximity under ER stress conditions (Acosta-Alvear et al., 2018) (Fig. 3F). Our analysis suggests that IRE1 $\alpha$  could not only regulate mRNA translation by interacting with several ribosomal proteins, but also through the regulation of ribosome biogenesis or their assembly since IRE1 $\alpha$  interacts with FTSJ3 and URB1 (Acosta-Alvear et al., 2018), two important regulators of ribosomal biogenesis (Morello et al., 2011). Other IRE1 $\alpha$ -binding proteins are involved in the translation machinery for rRNA, ncRNA and mRNAs, suggesting that IRE1 $\alpha$  could also regulate translation through the EIF4 complex. Hence, IRE1 $\alpha$  associates with ribosome and translocon components; however, the functional consequences of these interactions need to be defined.

#### DNA damage response

Although it was not found in our dataset analysis, we recently reported that ABL1, a previously characterized IRE1 $\alpha$ -interacting protein (Morita et al., 2017), induces the selective activation of IRE1 $\alpha$  under genotoxic stress to promote DNA repair programs. Upon DNA damage, ABL1 interacts with IRE1 $\alpha$ , selectively activating RIDD in the absence of *XBP1* mRNA splicing (Fig. 3G).

This activity results in the degradation of *Ppp2r1a* and *Ruvb1l* mRNAs, two factors that are involved in the DNA damage response (DDR) by regulating the de-phosphorylation of checkpoint kinase 1 and 2 (CHK1/2; also known as CHEK1/2) and histone 2AX (H2AX) (Chowdhury et al., 2005; Jha et al., 2008). The specific activation of IRE1 $\alpha$  by genotoxic stress promotes DNA repair and cell cycle progression, resulting in cell survival. This function is conserved in evolution as demonstrated in fly and mouse models of DNA damage (Dufey et al., 2020). Other studies have also linked the DDR with the UPR, because XBP1u controls the levels of p53, a central regulator of the DNA damage response, through its ubiquitylation and degradation (Huang et al., 2017). In addition, ER stress in tumor cells sensitizes cells to death induced by DNA-damaging agents (e.g. chemotherapy and radiotherapy) (Bobrovnikova-Marjon et al., 2010; Weatherbee et al., 2016; Yamamori et al., 2013). These studies suggest that the UPR functionally interacts with pathways that maintain genome stability.

In addition to the above examples, our GO enrichment analyses identified some interesting clusters of proteins involved in additional functions, including cell cycle control and protein transport (see Box 2 and Fig. 3H,I). Taken together, the analysis of the available interactome data sets reinforce the notion that the UPRosome is implicated in several biological processes that need to be further studied.

### Concluding remarks

The UPR is a central signal transduction pathway that acts to restore ER function and proteostasis, and engages a series of adaptive responses or triggers apoptosis under acute or sustained ER stress. The mechanisms that explain this transition from adaptive to pro-death are not

completely defined, but are essential to understanding how cell fate is determined under ER stress. One possible explanation may involve the dynamic nature of the UPRosome as a mechanism to regulate IRE1 $\alpha$  signaling outputs. BiP is the most validated IRE1 $\alpha$ -binding partner and has a fundamental role in adjusting the capacity of a cell to trigger the UPR. Importantly, several single studies suggest that UPR activation, and the threshold of ER stress to induce IRE1 $\alpha$  activation and attenuation, is regulated by other ER chaperones and foldases including HSP47, PDIA6 and PDIA1. We speculate that these observations represent the tip of the iceberg, suggesting that the ER stress surveillance process is broadly coupled to the folding machinery involving a complex network of chaperones.

After the proposition of the UPRosome concept more than 10 years ago (Hetz and Glimcher, 2009), many new IRE1 $\alpha$ -binding partners have been identified that modulate its activity, conformation and stability. As stated in Table 1, many of these interactions were determined using artificial overexpression systems and validated only once. Although the number of IRE1 $\alpha$ -binding partners is quite large (~47 proteins), with dozens of laboratories confirming the concept of the UPRosome, readers must be cautious when interpreting these data sets since further independent validation is needed. Despite the fact some of these interactors were defined in single studies, several binders were properly validated using different complementary approaches. Here, we provide a new layer of analysis by performing a broad bioinformatics assessment using most data sets available, highlighting clusters of proteins sharing similar functions, suggesting novel functions of the UPR through protein–protein interactions and eliminating the bias of one-time interactors or reports.

Overall, available studies assessing the nature of the IRE1 $\alpha$  interactome have revealed unexpected biological functions of the pathway in diverse processes such as autophagy, cell migration and cytoskeleton dynamics, protein translation and energy metabolism. Some of these emerging roles are mediated by non-canonical signaling modes independent of the canonical IRE1 $\alpha$  RNase domain, where IRE1 $\alpha$  operates as a scaffold that recruits proteins involved in multiple cellular processes. Thus, we propose that a comprehensive analysis of the IRE1 $\alpha$  interactome is required to understand the global impact of the pathway to cell physiology and disease. We expect that, depending on the cell type and stimuli analyzed, distinct UPRosomes are assembled in a dynamic manner. There might be even different IRE1 $\alpha$ -containing complexes in different ER compartments, as we proposed for the MAM subdomains. Since IRE1 $\alpha$  function and dysfunction has been extensively linked to different human diseases, strategies to fine tune the composition and activity of the UPRosome may have important therapeutic applications.

### Acknowledgements

We thank R. Aravena for table compilation.

### Competing interests

The authors declare no competing or financial interests.

### Funding

This work was funded by Fondo Nacional de Desarrollo Científico y Tecnológico (FONDECYT) 11180825 (H.U.), FONDECYT 1180186 (C.H.), FONDECYT 3200716 (P.P.) ANID/FONDAP/15150012 (C.H.), ECOS Comisión Nacional de Investigación Científica y Tecnológica (CONICYT) Cooperation grant Chile–France ECOS170032 (H.U., C.H.), Millennium Institute P09-015-F (C.H.) and European Commission R&D MSCA-RISE 734749 (C.H.). We also thank the support from Michael J Fox Foundation for Parkinson's Research – Target Validation grant 9277, FONDEF ID16110223, FONDEF D11E1007 (C.H.).

### Supplementary information

Supplementary information available online at <http://jcs.biologists.org/lookup/doi/10.1242/jcs.218107.supplemental>

### Box 2. Deciphering novel physiological functions of IRE1 $\alpha$

Our GO enrichment analyses and functional clustering of IRE1 $\alpha$ -binding partners identified some interesting clusters of proteins involved in different functions including cell cycle control and cytokinesis (Fig. 3H). IRE1 $\alpha$  interacts with CORO1B and CORO1C, two coronins that together with the Arp2/3 complex control actin rearrangement and cell cycle progression (Molinie et al., 2019). PRC1 and NUSAP1, two important players involved in cytokinesis regulation and cancer progression, were also identified (Li et al., 2018). In addition, our analysis also revealed a cluster of proteins regulating vesicle transport and protein targeting (Fig. 3I). For example, distinct isoforms of Sec24 are observed that are part of the coat protein complex II (COPII), which is involved in the selection of cargo proteins and the formation of transport vesicles at the ER (Mancias and Goldberg, 2007). In addition, proteins involved in vesicle transport and fusion, like SNAP23 and SNAPIN, are also detected in IRE1 $\alpha$ -containing protein complexes (van Niel et al., 2018). Several molecular motors involved in mRNA trafficking, such as KIF5B and FXR2 (Hirokawa, 2006), are detected in IRE1 $\alpha$ -containing protein complexes that are crucial for axonal transport, promoting axonal growth cone and dendrite morphogenesis (Fig. 3I). IRE1 $\alpha$  can also interact with proteins involved in cell differentiation, including the myeloid, hematopoietic and osteoblastic lineage (Table S2). In addition, IRE1 $\alpha$  associates with crucial components involved in viral transcription, replication and defense (Table S2). Viral infection induces ER stress (Verchot, 2016); however, the actual impact of IRE1 $\alpha$  on viral infection and replication is poorly defined. Our analysis reinforces the idea that IRE1 $\alpha$  interacts with partners involved in immune responses including antigen processing and presentation via MHC class I, cytokine production and secretion, and phagocytosis. This is in agreement with functional studies indicating that IRE1 $\alpha$  can regulate some of these processes by mechanism involving RIDD or XBP1s (for an extensive review, see Osorio et al., 2018).

## References

- Acosta-Alvear, D., Karagöz, G. E., Fröhlich, F., Li, H., Walther, T. C. and Walter, P.** (2018). The unfolded protein response and endoplasmic reticulum protein targeting machineries converge on the stress sensor IRE1. *eLife* **7**, e43036. doi:10.7554/eLife.43036
- Adachi, Y., Yamamoto, K., Okada, T., Yoshida, H., Harada, A. and Mori, K.** (2008). ATF6 is a transcription factor specializing in the regulation of quality control proteins in the endoplasmic reticulum. *Cell Struct. Funct.* **33**, 75–89. doi:10.1247/csf.07044
- Adams, C. J., Kopp, M. C., Larburu, N., Nowak, P. R. and Ali, M. M. U.** (2019). Structure and molecular mechanism of ER stress signaling by the unfolded protein response signal activator IRE1. *Front. Mol. Biosci.* **6**, 11. doi:10.3389/fmolb.2019.00011
- Amin-Wetzel, N., Saunders, R. A., Kamphuis, M. J., Rato, C., Preissler, S., Harding, H. P. and Ron, D.** (2017). A J-protein co-chaperone recruits BiP to monomerize IRE1 and repress the unfolded protein response. *Cell* **171**, 1625–1637.e13. doi:10.1016/j.cell.2017.10.040
- Amin-Wetzel, N., Neidhardt, L., Yan, Y., Mayer, M. P. and Ron, D.** (2019). Unstructured regions in IRE1 $\alpha$  specify BiP-mediated destabilisation of the luminal domain dimer and repression of the UPR. *eLife* **8**, e50793. doi:10.7554/eLife.50793
- Armstrong, M. C., Šestak, S., Ali, A. A., Sagini, H. A. M., Brown, M., Baty, K., Treumann, A. and Schröder, M.** (2017). Bypass of activation loop phosphorylation by aspartate 836 in activation of the endoribonuclease activity of Ire1. *Mol. Cell Biol.* **37**, e00655–16. doi:10.1128/mcb.00655-16
- Arshad, M., Ye, Z., Gu, X., Wong, C. K., Liu, Y., Li, D., Zhou, L., Zhang, Y., Bay, W. P., Yu, V. C. et al.** (2013). RNF13, a RING finger protein, mediates endoplasmic reticulum stress-induced apoptosis through the inositol-requiring enzyme (IRE1 $\alpha$ )/c-Jun NH2-terminal kinase pathway. *J. Biol. Chem.* **288**, 8726–8736. doi:10.1074/jbc.M112.368829
- Augusto, L., Martynowicz, J., Amin, P. H., Alakhras, N. S., Kaplan, M. H., Wek, R. C. and Sullivan, W. J., Jr.** (2020). Toxoplasma gondii co-opts the unfolded protein response to enhance migration and dissemination of infected host cells. *mBio* **11**, e00915–20. doi:10.1128/mBio.00915-20
- Bailly-Maitre, B., Fondevila, C., Kaldas, F., Droin, N., Luciano, F., Ricci, J. E., Croxton, R., Krajewska, M., Zapata, J. M., Kupiec-Weglinski, J. W. et al.** (2006). Cytoprotective gene bi-1 is required for intrinsic protection from endoplasmic reticulum stress and ischemia-reperfusion injury. *Proc. Natl. Acad. Sci. USA* **103**, 2809–2814. doi:10.1073/pnas.0506854103
- Bailly-Maitre, B., Belgardt, B. F., Jordan, S. D., Coornaert, B., von Freyend, M., Kleinriders, A., Mauer, J., Cuddy, M., Kress, C. L., Willmes, D. et al.** (2010). Hepatic Bax inhibitor-1 inhibits IRE1 $\alpha$  and protects from obesity-associated insulin resistance and glucose intolerance. *J. Biol. Chem.* **285**, 6198–6207. doi:10.1074/jbc.M109.056648
- Bashir, S. and Majid Fazili, K.** (2019). Bid as a novel interacting partner of IRE1 differentially regulating its RNase activity. *bioRxiv*. doi:10.1101/572222
- Belyy, V., Tran, N. H. and Walter, P.** (2020). Quantitative microscopy reveals dynamics and fate of clustered IRE1 $\alpha$ . *Proc. Natl. Acad. Sci. USA* **117**, 1533–1542. doi:10.1073/pnas.1915311117
- Bertolotti, A., Zhang, Y., Hendershot, L. M., Harding, H. P. and Ron, D.** (2000). Dynamic interaction of BiP and ER stress transducers in the unfolded-protein response. *Nat. Cell Biol.* **2**, 326–332. doi:10.1038/35014014
- Bobrovnikova-Marjon, E., Grigoriadou, C., Pytel, D., Zhang, F., Ye, J., Koumenis, C., Cavener, D. and Diehl, J. A.** (2010). PERK promotes cancer cell proliferation and tumor growth by limiting oxidative DNA damage. *Oncogene* **29**, 3881–3895. doi:10.1038/onc.2010.153
- Bouchecareilh, M., Higa, A., Fribourg, S., Moenner, M. and Chevet, E.** (2011). Peptides derived from the bifunctional kinase/RNase enzyme IRE1 $\alpha$  modulate IRE1 $\alpha$  activity and protect cells from endoplasmic reticulum stress. *FASEB J.* **25**, 3115–3129. doi:10.1096/fj.11-182931
- Brozzi, F., Gerlo, S., Grieco, F. A., Nardelli, T. R., Lievens, S., Gysemans, C., Marselli, L., Marchetti, P., Mathieu, C., Tavernier, J. et al.** (2014). A combined “omics” approach identifies N-Myc interactor as a novel cytokine-induced regulator of IRE1 $\alpha$  protein and c-Jun N-terminal kinase in pancreatic beta cells. *J. Biol. Chem.* **289**, 20677–20693. doi:10.1074/jbc.M114.568808
- Brozzi, F., Gerlo, S., Grieco, F. A., Juusola, M., Balhuizen, A., Lievens, S., Gysemans, C., Bugliani, M., Mathieu, C., Marchetti, P. et al.** (2016). Ubiquitin D regulates IRE1 $\alpha$ /c-Jun N-terminal kinase (JNK) protein-dependent apoptosis in pancreatic beta cells. *J. Biol. Chem.* **291**, 12040–12056. doi:10.1074/jbc.M115.704619
- Cai, L., Marshall, T. W., Uetrecht, A. C., Schafer, D. A. and Bear, J. E.** (2007). Coronin 1B coordinates Arp2/3 complex and cofilin activities at the leading edge. *Cell* **128**, 915–929. doi:10.1016/j.cell.2007.01.031
- Calfon, M., Zeng, H., Urano, F., Till, J. H., Hubbard, S. R., Harding, H. P., Clark, S. G. and Ron, D.** (2002). IRE1 couples endoplasmic reticulum load to secretory capacity by processing the XBP-1 mRNA. *Nature* **415**, 92–96. doi:10.1038/415092a
- Carrara, M., Prischi, F., Nowak, P. R., Kopp, M. C. and Ali, M. M.** (2015). Noncanonical binding of BiP ATPase domain to Ire1 and Perk is dissociated by unfolded protein CH1 to initiate ER stress signaling. *eLife* **4**, e03522. doi:10.7554/eLife.03522
- Carreras-Sureda, A., Jana, F., Urrea, H., Durand, S., Mortenson, D. E., Sagredo, A., Bustos, G., Hazari, Y., Ramos-Fernandez, E., Sassano, M. L. et al.** (2019). Non-canonical function of IRE1 $\alpha$  determines mitochondria-associated endoplasmic reticulum composition to control calcium transfer and bioenergetics. *Nat. Cell Biol.* **21**, 755–767. doi:10.1038/s41556-019-0329-y
- Castillo, K., Rojas-Rivera, D., Lisbona, F., Caballero, B., Nassif, M., Court, F. A., Schuck, S., Ibar, C., Walter, P., Sierralta, J. et al.** (2011). BAX inhibitor-1 regulates autophagy by controlling the IRE1 $\alpha$  branch of the unfolded protein response. *EMBO J.* **30**, 4465–4478. doi:10.1038/emboj.2011.318
- Chang, T. K., Lawrence, D. A., Lu, M., Tan, J., Harnoss, J. M., Marsters, S. A., Liu, P., Sandoval, W., Martin, S. E. and Ashkenazi, A.** (2018). Coordination between two branches of the unfolded protein response determines apoptotic cell fate. *Mol. Cell* **71**, 629–636.e5. doi:10.1016/j.molcel.2018.06.038
- Chowdhury, D., Keogh, M. C., Ishii, H., Peterson, C. L., Buratowski, S. and Lieberman, J.** (2005). gamma-H2AX dephosphorylation by protein phosphatase 2A facilitates DNA double-strand break repair. *Mol. Cell* **20**, 801–809. doi:10.1016/j.molcel.2005.10.003
- Credle, J. J., Finer-Moore, J. S., Papa, F. R., Stroud, R. M. and Walter, P.** (2005). On the mechanism of sensing unfolded protein in the endoplasmic reticulum. *Proc. Natl. Acad. Sci. USA* **102**, 18773–18784. doi:10.1073/pnas.0509487102
- Csordás, G., Várnai, P., Golenár, T., Roy, S., Purkins, G., Schneider, T. G., Balla, T. and Hajnóczky, G.** (2010). Imaging interorganelle contacts and local calcium dynamics at the ER-mitochondrial interface. *Mol. Cell* **39**, 121–132. doi:10.1016/j.molcel.2010.06.029
- Dalton, R. P., Karagöz, G. E., Kahiapo, J., Sharma, R., Bashkirova, L. E., Lyons, D. B., Matsunami, H. and Walter, P.** (2018). Olfactory and vomeronasal receptor feedback employ divergent mechanisms of PERK Activation. *bioRxiv*, 239830. doi:10.1101/239830
- Dubnikov, T., Ben-Gedalya, T. and Cohen, E.** (2017). Protein quality control in chaperone and disease. *Cold Spring Harb. Perspect. Biol.* **9**, a023523. doi:10.1101/cshperspect.a023523
- Dufey, E., Bravo-San Pedro, J. M., Eggers, C., González-Quiroz, M., Urrea, H., Sagredo, A. I., Sepulveda, D., Pihán, P., Carreras-Sureda, A., Hazari, Y. et al.** (2020). Genotoxic stress triggers the activation of IRE1 $\alpha$ -dependent RNA decay to modulate the DNA damage response. *Nat. Commun.* **11**, 2401. doi:10.1038/s41467-020-15694-y
- Eletto, D., Dersh, D., Gidalevitz, T. and Argon, Y.** (2014). Protein disulfide isomerase A6 controls the decay of IRE1 $\alpha$  signaling via disulfide-dependent association. *Mol. Cell* **53**, 562–576. doi:10.1016/j.molcel.2014.01.004
- Eletto, D., Boyle, S. and Argon, Y.** (2016). PDIA6 regulates insulin secretion by selectively inhibiting the RIDD activity of IRE1. *FASEB J.* **30**, 653–665. doi:10.1096/fj.15-275883
- Estornes, Y., Aguleta, M. A., Dubuisson, C., De Keyser, J., Goossens, V., Kersse, K., Samali, A., Vandenebeele, P. and Bertrand, M. J.** (2014). RIPK1 promotes death receptor-independent caspase-8-mediated apoptosis under unresolved ER stress conditions. *Cell Death Dis.* **5**, e1555. doi:10.1038/cddis.2014.523
- Fox, J. W., Lamperti, E. D., Eksioğlu, Y. Z., Hong, S. E., Feng, Y., Graham, D. A., Scheffer, I. E., Dobyms, W. B., Hirsch, B. A., Radtke, R. A. et al.** (1998). Mutations in filamin 1 prevent migration of cerebral cortical neurons in human periventricular heterotopia. *Neuron* **21**, 1315–1325. doi:10.1016/S0896-6273(00)80651-0
- Gao, B., Lee, S. M., Chen, A., Zhang, J., Zhang, D. D., Kannan, K., Ortmann, R. A. and Fang, D.** (2008). Synoviolin promotes IRE1 ubiquitination and degradation in synovial fibroblasts from mice with collagen-induced arthritis. *EMBO Rep.* **9**, 480–485. doi:10.1038/embo.2008.37
- Gardner, B. M. and Walter, P.** (2011). Unfolded proteins are Ire1-activating ligands that directly induce the unfolded protein response. *Science* **333**, 1891–1894. doi:10.1126/science.1209126
- Ghosh, R., Wang, L., Wang, E. S., Perera, B. G., Igbaria, A., Morita, S., Prado, K., Thamsen, M., Caswell, D., Macias, H. et al.** (2014). Allosteric inhibition of the IRE1 $\alpha$  RNase preserves cell viability and function during endoplasmic reticulum stress. *Cell* **158**, 534–548. doi:10.1016/j.cell.2014.07.002
- Giacomello, M., Drago, I., Bortolozzi, M., Scorsetto, M., Gianella, A., Pizzo, P. and Pozzan, T.** (2010). Ca<sup>2+</sup> hot spots on the mitochondrial surface are generated by Ca<sup>2+</sup> mobilization from stores, but not by activation of store-operated Ca<sup>2+</sup> channels. *Mol. Cell* **38**, 280–290. doi:10.1016/j.molcel.2010.04.003
- Giorgi, C., Marchi, S. and Pinton, P.** (2018). The machineries, regulation and cellular functions of mitochondrial calcium. *Nat. Rev. Mol. Cell Biol.* **19**, 713–730. doi:10.1038/s41580-018-0052-8
- Groenendyk, J., Peng, Z., Dudek, E., Fan, X., Mizianty, M. J., Dufey, E., Urrea, H., Sepulveda, D., Rojas-Rivera, D., Lim, Y. et al.** (2014). Interplay between the oxidoreductase PDIA6 and microRNA-322 controls the response to disrupted endoplasmic reticulum calcium homeostasis. *Sci. Signal.* **7**, ra54. doi:10.1126/scisignal.2004983
- Gu, F., Nguyễn, D. T., Stuiblé, M., Dubé, N., Tremblay, M. L. and Chevet, E.** (2004). Protein-tyrosine phosphatase 1B potentiates IRE1 signaling during



- endoplasmic reticulum stress. *J. Biol. Chem.* **279**, 49689–49693. doi:10.1074/jbc.C400261200
- Gupta, S., Deepti, A., Deegan, S., Lisbona, F., Hetz, C. and Samali, A.** (2010). HSP72 protects cells from ER stress-induced apoptosis via enhancement of IRE1 $\alpha$ -XBP1 signaling through a physical interaction. *PLoS Biol.* **8**, e1000410. doi:10.1371/journal.pbio.1000410
- Hallbleib, K., Pesek, K., Covino, R., Hofbauer, H. F., Wunnicke, D., Hänelt, I., Hummer, G. and Ernst, R.** (2017). Activation of the unfolded protein response by lipid bilayer stress. *Mol. Cell* **67**, 673–684.e8. doi:10.1016/j.molcel.2017.06.012
- Han, J., Back, S. H., Hur, J., Lin, Y.-H., Gildersleeve, R., Shan, J., Yuan, C. L., Krokowski, D., Wang, S., Hatzoglou, M. et al.** (2013). ER-stress-induced transcriptional regulation increases protein synthesis leading to cell death. *Nat. Cell Biol.* **15**, 481–490. doi:10.1038/ncb2738
- Harding, H. P., Novoa, I., Zhang, Y., Zeng, H., Wek, R., Schapira, M. and Ron, D.** (2000a). Regulated translation initiation controls stress-induced gene expression in mammalian cells. *Mol. Cell* **6**, 1099–1108. doi:10.1016/S1097-2765(00)00108-8
- Harding, H. P., Zhang, Y., Bertolotti, A., Zeng, H. and Ron, D.** (2000b). Perk is essential for translational regulation and cell survival during the unfolded protein response. *Mol. Cell* **5**, 897–904. doi:10.1016/S1097-2765(00)80330-5
- Hart, L. S., Cunningham, J. T., Datta, T., Dey, S., Tameire, F., Lehman, S. L., Qiu, B., Zhang, H., Cerniglia, G., Bi, M. et al.** (2012). ER stress-mediated autophagy promotes Myc-dependent transformation and tumor growth. *J. Clin. Invest.* **122**, 4621–4634. doi:10.1172/JCI62973
- Hayashi, T. and Su, T.-P.** (2007). Sigma-1 receptor chaperones at the ER-mitochondrion interface regulate Ca<sup>2+</sup> signaling and cell survival. *Cell* **131**, 596–610. doi:10.1016/j.cell.2007.08.036
- Haze, K., Yoshida, H., Yanagi, H., Yura, T. and Mori, K.** (1999). Mammalian transcription factor ATF6 is synthesized as a transmembrane protein and activated by proteolysis in response to endoplasmic reticulum stress. *Mol. Biol. Cell* **10**, 3787–3799. doi:10.1091/mbc.10.11.3787
- He, Y., Beatty, A., Han, X., Ji, Y., Ma, X., Adelstein, R. S., Yates, J. R., III, Kempfues, K. and Qi, L.** (2012). Nonmuscle myosin IIB links cytoskeleton to IRE1 $\alpha$  signaling during ER stress. *Dev. Cell* **23**, 1141–1152. doi:10.1016/j.devcel.2012.11.006
- Hetz, C.** (2012). The unfolded protein response: controlling cell fate decisions under ER stress and beyond. *Nat. Rev. Mol. Cell Biol.* **13**, 89–102. doi:10.1038/nrm3270
- Hetz, C. and Glimcher, L. H.** (2009). Fine-tuning of the unfolded protein response: assembling the IRE1 $\alpha$  interactome. *Mol. Cell* **35**, 551–561. doi:10.1016/j.molcel.2009.08.021
- Hetz, C. and Papa, F. R.** (2018). The unfolded protein response and cell fate control. *Mol. Cell* **69**, 169–181. doi:10.1016/j.molcel.2017.06.017
- Hetz, C., Bernasconi, P., Fisher, J., Lee, A. H., Bassich, M. C., Antonsson, B., Brandt, G. S., Iwakoshi, N. N., Schinzel, A., Glimcher, L. H. et al.** (2006). Proapoptotic BAX and BAK modulate the unfolded protein response by a direct interaction with IRE1 $\alpha$ . *Science* **312**, 572–576. doi:10.1126/science.1123480
- Hetz, C., Thielen, P., Matus, S., Nassif, M., Court, F., Kiffin, R., Martinez, G., Cuervo, A. M., Brown, R. H. and Glimcher, L. H.** (2009). XBP-1 deficiency in the nervous system protects against amyotrophic lateral sclerosis by increasing autophagy. *Genes Dev.* **23**, 2294–2306. doi:10.1101/gad.1830709
- Hetz, C., Martinon, F., Rodriguez, D. and Glimcher, L. H.** (2011). The unfolded protein response: integrating stress signals through the stress sensor IRE1 $\alpha$ . *Physiol. Rev.* **91**, 1219–1243. doi:10.1152/physrev.00001.2011
- Hetz, C., Zhang, K. and Kaufman, R. J.** (2020). Mechanisms, regulation and functions of the unfolded protein response. *Nat. Rev. Mol. Cell Biol.* **21**, 421–438. doi:10.1038/s41580-020-0250-z
- Hirokawa, N.** (2006). mRNA transport in dendrites: RNA granules, motors, and tracks. *J. Neurosci.* **26**, 7139–7142. doi:10.1523/JNEUROSCI.1821-06.2006
- Hollien, J. and Weissman, J. S.** (2006). Decay of endoplasmic reticulum-localized mRNAs during the unfolded protein response. *Science* **313**, 104–107. doi:10.1126/science.1129631
- Hollien, J., Lin, J. H., Li, H., Stevens, N., Walter, P. and Weissman, J. S.** (2009). Regulated Ire1-dependent decay of messenger RNAs in mammalian cells. *J. Cell Biol.* **186**, 323–331. doi:10.1083/jcb.200903014
- Hoyer, M. J., Chitwood, P. J., Ebmeier, C. C., Striepen, J. F., Qi, R. Z., Old, W. M. and Voeltz, G. K.** (2018). A novel class of ER membrane proteins regulates ER-associated endosome fission. *Cell* **175**, 254–265.e14. doi:10.1016/j.cell.2018.08.030
- Hu, P., Han, Z., Couvillon, A. D., Kaufman, R. J. and Exton, J. H.** (2006). Autocrine tumor necrosis factor  $\alpha$  links endoplasmic reticulum stress to the membrane death receptor pathway through IRE1 $\alpha$ -mediated NF- $\kappa$ B activation and down-regulation of TRAF2 expression. *Mol. Cell Biol.* **26**, 3071–3084. doi:10.1128/MCB.26.8.3071-3084.2006
- Huang, C., Wu, S., Ji, H., Yan, X., Xie, Y., Murai, S., Zhao, H., Miyagishi, M. and Kasim, V.** (2017). Identification of XBP1-u as a novel regulator of the MDM2/p53 axis using an shRNA library. *Sci. Adv.* **3**, e1701383. doi:10.1126/sciadv.1701383
- Hwang, J. and Qi, L.** (2018). Quality control in the endoplasmic reticulum: crosstalk between ERAD and UPR pathways. *Trends Biochem. Sci.* **43**, 593–605. doi:10.1016/j.tibs.2018.06.005
- Ishiwata-Kimata, Y., Yamamoto, Y. H., Takizawa, K., Kohno, K. and Kimata, Y.** (2013). F-actin and a type-II myosin are required for efficient clustering of the ER stress sensor Ire1. *Cell Struct. Funct.* **38**, 135–143. doi:10.1247/csf.12033
- Jha, S., Shibata, E. and Dutta, A.** (2008). Human Rvb1/Tip49 is required for the histone acetyltransferase activity of Tip60/NuA4 and for the downregulation of phosphorylation on H2AX after DNA damage. *Mol. Cell Biol.* **28**, 2690–2700. doi:10.1128/MCB.01983-07
- Jurkin, J., Henkel, T., Nielsen, A. F., Minnich, M., Popow, J., Kaufmann, T., Heindl, K., Hoffmann, T., Busslinger, M. and Martinez, J.** (2014). The mammalian tRNA ligase complex mediates splicing of XBP1 mRNA and controls antibody secretion in plasma cells. *EMBO J.* **33**, 2922–2936. doi:10.15252/embj.201490332
- Jwa, M. and Chang, P.** (2012). PARP16 is a tail-anchored endoplasmic reticulum protein required for the PERK- and IRE1 $\alpha$ -mediated unfolded protein response. *Nat. Cell Biol.* **14**, 1223–1230. doi:10.1038/ncb2593
- Karagöz, G. E., Acosta-Alvear, D., Nguyen, H. T., Lee, C. P., Chu, F. and Walter, P.** (2017). An unfolded protein-induced conformational switch activates mammalian IRE1. *eLife* **6**, e30700. doi:10.7554/eLife.30700
- Karagöz, G. E., Acosta-Alvear, D. and Walter, P.** (2019). The unfolded protein response: detecting and responding to fluctuations in the protein-folding capacity of the endoplasmic reticulum. *Cold Spring Harb. Perspect. Biol.* **11**, a033886. doi:10.1101/cshperspect.a033886
- Katayama, T., Imaizumi, K., Sato, N., Miyoshi, K., Kudo, T., Hitomi, J., Morihara, T., Yoneda, T., Gomi, F., Mori, Y. et al.** (1999). Presenilin-1 mutations downregulate the signalling pathway of the unfolded-protein response. *Nat. Cell Biol.* **1**, 479–485. doi:10.1038/70265
- Kaushik, S., Bandyopadhyay, U., Sridhar, S., Kiffin, R., Martinez-Vicente, M., Kon, M., Orenstein, S. J., Wong, E. and Cuervo, A. M.** (2011). Chaperone-mediated autophagy at a glance. *J. Cell Sci.* **124**, 495–499. doi:10.1242/jcs.073874
- Kim, H. and McCulloch, C. A.** (2011). Filamin A mediates interactions between cytoskeletal proteins that control cell adhesion. *FEBS Lett.* **585**, 18–22. doi:10.1016/j.febslet.2010.11.033
- Kishino, A., Hayashi, K., Hidai, C., Masuda, T., Nomura, Y. and Oshima, T.** (2017). XBP1-FoxO1 interaction regulates ER stress-induced autophagy in auditory cells. *Sci. Rep.* **7**, 4442. doi:10.1038/s41598-017-02960-1
- Kiviluoto, S., Vervliet, T., Ivanova, H., Decuyper, J. P., De Smedt, H., Missiaen, L., Bultynck, G. and Parys, J. B.** (2013). Regulation of inositol 1,4,5-trisphosphate receptors during endoplasmic reticulum stress. *Biochim. Biophys. Acta* **1833**, 1612–1624. doi:10.1016/j.bbamcr.2013.01.026
- Kono, N., Amin-Wetzel, N. and Ron, D.** (2017). Generic membrane-spanning features endow IRE1 $\alpha$  with responsiveness to membrane aberrancy. *Mol. Cell Biol.* **28**, 2318–2332. doi:10.1091/mbc.e17-03-0144
- Kopp, M. C., Nowak, P. R., Larburu, N., Adams, C. J. and Ali, M. M.** (2018). In vitro FRET analysis of IRE1 and BiP association and dissociation upon endoplasmic reticulum stress. *eLife* **7**, e30257. doi:10.7554/eLife.30257
- Kosmaczewski, S. G., Edwards, T. J., Han, S. M., Eckwahl, M. J., Meyer, B. I., Peach, S., Hesselberth, J. R., Wolin, S. L. and Hammarlund, M.** (2014). The RtcB RNA ligase is an essential component of the metazoan unfolded protein response. *EMBO Rep.* **15**, 1278–1285. doi:10.15252/embr.201439531
- Kulak, N. A., Pichler, G., Paron, I., Nagaraj, N. and Mann, M.** (2014). Minimal, encapsulated proteomic-sample processing applied to copy-number estimation in eukaryotic cells. *Nat. Methods* **11**, 319–324. doi:10.1038/nmeth.2834
- Lebeaupin, C., Vallée, D., Rousseau, D., Patouraux, S., Bonnafont, S., Adam, G., Luciano, F., Luci, C., Anty, R., Iannelli, A. et al.** (2018). Bax inhibitor-1 protects from nonalcoholic steatohepatitis by limiting inositol-requiring enzyme 1  $\alpha$  signaling in mice. *Hepatology* **68**, 515–532. doi:10.1002/hep.29847
- Lee, K., Tirasophon, W., Shen, X., Michalak, M., Prywes, R., Okada, T., Yoshida, H., Mori, K. and Kaufman, R. J.** (2002). IRE1-mediated unconventional mRNA splicing and S2P-mediated ATF6 cleavage merge to regulate XBP1 in signaling the unfolded protein response. *Genes Dev.* **16**, 452–466. doi:10.1101/gad.964702
- Li, J., Dallmayer, M., Kirchner, T., Musa, J. and Grünewald, T. G. P.** (2018). PRC1: linking cytokinesis, chromosomal instability, and cancer evolution. *Trends Cancer* **4**, 59–73. doi:10.1016/j.trecan.2017.11.002
- Lisbona, F., Rojas-Rivera, D., Thielen, P., Zamorano, S., Todd, D., Martinon, F., Glavic, A., Kress, C., Lin, J. H., Walter, P. et al.** (2009). BAX inhibitor-1 is a negative regulator of the ER stress sensor IRE1 $\alpha$ . *Mol. Cell* **33**, 679–691. doi:10.1016/j.molcel.2009.02.017
- Liu, J., Wang, Y., Song, L., Zeng, L., Yi, W., Liu, T., Chen, H., Wang, M., Ju, Z. and Cong, Y. S.** (2017). A critical role of DDRGK1 in endoplasmic reticulum homeostasis via regulation of IRE1 $\alpha$  stability. *Nat. Commun.* **8**, 14186. doi:10.1038/ncomms14186
- Lu, G., Ota, A., Ren, S., Franklin, S., Rau, C. D., Ping, P., Lane, T. F., Zhou, Z. H., Reue, K., Lusic, A. J. et al.** (2013). PPM1 $\alpha$  encodes an inositol requiring-protein 1 (IRE1) specific phosphatase that regulates the functional outcome of the ER stress response. *Mol. Metab.* **2**, 405–416. doi:10.1016/j.molmet.2013.07.005
- Lu, Y., Liang, F. X. and Wang, X.** (2014). A synthetic biology approach identifies the mammalian UPR RNA ligase RtcB. *Mol. Cell* **55**, 758–770. doi:10.1016/j.molcel.2014.06.032
- Luo, D., He, Y., Zhang, H., Yu, L., Chen, H., Xu, Z., Tang, S., Urano, F. and Min, W.** (2008). AIP1 is critical in transducing IRE1-mediated endoplasmic reticulum stress response. *J. Biol. Chem.* **283**, 11905–11912. doi:10.1074/jbc.M710557200
- Lynch, C. D. and Sheetz, M. P.** (2011). Cellular mechanotransduction: filamin A strains to regulate motility. *Curr. Biol.* **21**, R916–R918. doi:10.1016/j.cub.2011.10.020



- Mancias, J. D. and Goldberg, J. (2007). The transport signal on Sec22 for packaging into COPII-coated vesicles is a conformational epitope. *Mol. Cell* **26**, 403-414. doi:10.1016/j.molcel.2007.03.017
- Mao, T., Shao, M., Qiu, Y., Huang, J., Zhang, Y., Song, B., Wang, Q., Jiang, L., Liu, Y., Han, J.-D. J. et al. (2011). PKA phosphorylation couples hepatic inositol-requiring enzyme 1alpha to glucagon signaling in glucose metabolism. *Proc. Natl. Acad. Sci. USA* **108**, 15852-15857. doi:10.1073/pnas.1107394108
- Marciniak, S. J., Yun, C. Y., Oyadomari, S., Novoa, I., Zhang, Y., Jungreis, R., Nagata, K., Harding, H. P. and Ron, D. (2004). CHOP induces death by promoting protein synthesis and oxidation in the stressed endoplasmic reticulum. *Genes Dev.* **18**, 3066-3077. doi:10.1101/gad.1250704
- Marcu, M. G., Doyle, M., Bertolotti, A., Ron, D., Hendershot, L. and Neckers, L. (2002). Heat shock protein 90 modulates the unfolded protein response by stabilizing IRE1alpha. *Mol. Cell. Biol.* **22**, 8506-8513. doi:10.1128/MCB.22.24.8506-8513.2002
- Martínez, G., Vidal, R. L., Mardones, P., Serrano, F. G., Ardiles, A. O., Wirth, C., Valdés, P., Thielen, P., Schneider, B. L., Kerr, B. et al. (2016). Regulation of memory formation by the transcription factor XBP1. *Cell Rep.* **14**, 1382-1394. doi:10.1016/j.celrep.2016.01.028
- Martínez, G., Khatiwada, S., Costa-Mattioli, M. and Hetz, C. (2018). ER proteostasis control of neuronal physiology and synaptic function. *Trends Neurosci.* **41**, 610-624. doi:10.1016/j.tins.2018.05.009
- Maurel, M., Chevet, E., Tavernier, J. and Gerlo, S. (2014). Getting RIDD of RNA: IRE1 in cell fate regulation. *Trends Biochem. Sci.* **39**, 245-254. doi:10.1016/j.tibs.2014.02.008
- Moliné, N., Rubtsova, S. N., Fokin, A., Visweshwaran, S. P., Rocques, N., Poleskaya, A., Schnitzler, A., Vacher, S., Denisov, E. V., Tashireva, L. A. et al. (2019). Cortical branched actin determines cell cycle progression. *Cell Res.* **29**, 432-445. doi:10.1038/s41422-019-0160-9
- Morello, L. G., Coltri, P. P., Quaresma, A. J., Simabuco, F. M., Silva, T. C., Singh, G., Nickerson, J. A., Oliveira, C. C., Moore, M. J. and Zanchin, N. I. (2011). The human nucleolar protein FTSJ3 associates with NIP7 and functions in pre-rRNA processing. *PLoS ONE* **6**, e29174. doi:10.1371/journal.pone.0029174
- Mori, T., Hayashi, T., Hayashi, E. and Su, T. P. (2013). Sigma-1 receptor chaperone at the ER-mitochondrion interface mediates the mitochondrion-ER-nucleus signaling for cellular survival. *PLoS ONE* **8**, e76941. doi:10.1371/journal.pone.0076941
- Morita, S., Villalta, S. A., Feldman, H. C., Register, A. C., Rosenthal, W., Hoffmann-Petersen, I. T., Mehdizadeh, M., Ghosh, R., Wang, L., Colonnegro, K. et al. (2017). Targeting ABL-IRE1alpha signaling spares ER-stressed pancreatic beta cells to reverse autoimmune diabetes. *Cell Metab.* **25**, 883-897.e8. doi:10.1016/j.cmet.2017.03.018
- Nagai, A., Kadowaki, H., Maruyama, T., Takeda, K., Nishitoh, H. and Ichijo, H. (2009). USP14 inhibits ER-associated degradation via interaction with IRE1alpha. *Biochem. Biophys. Res. Commun.* **379**, 995-1000. doi:10.1016/j.bbrc.2008.12.182
- Nakato, R., Ohkubo, Y., Konishi, A., Shibata, M., Kaneko, Y., Iwawaki, T., Nakamura, T., Lipton, S. A. and Uehara, T. (2015). Regulation of the unfolded protein response via S-nitrosylation of sensors of endoplasmic reticulum stress. *Sci. Rep.* **5**, 14812. doi:10.1038/srep14812
- Nguyen, D. T., Kebache, S., Fazel, A., Wong, H. N., Jenna, S., Emadali, A., Lee, E. H., Bergeron, J. J., Kaufman, R. J., Larose, L. et al. (2004). Nck-dependent activation of extracellular signal-regulated kinase-1 and regulation of cell survival during endoplasmic reticulum stress. *Mol. Biol. Cell* **15**, 4248-4260. doi:10.1091/mbc.e03-11-0851
- Nishitoh, H., Matsuzawa, A., Tobiume, K., Saegusa, K., Takeda, K., Inoue, K., Hori, S., Kakizuka, A. and Ichijo, H. (2002). ASK1 is essential for endoplasmic reticulum stress-induced neuronal cell death triggered by expanded polyglutamine repeats. *Genes Dev.* **16**, 1345-1355. doi:10.1101/gad.992302
- Oakes, S. A. and Papa, F. R. (2015). The role of endoplasmic reticulum stress in human pathology. *Annu. Rev. Pathol.* **10**, 173-194. doi:10.1146/annurev-pathol-012513-104649
- Oikawa, D., Kimata, Y., Kohno, K. and Iwawaki, T. (2009). Activation of mammalian IRE1alpha upon ER stress depends on dissociation of BiP rather than on direct interaction with unfolded proteins. *Exp. Cell Res.* **315**, 2496-2504. doi:10.1016/j.yexcr.2009.06.009
- Okamura, K., Kimata, Y., Higashio, H., Tsuru, A. and Kohno, K. (2000). Dissociation of Kar2p/BiP from an ER sensory molecule, Ire1p, triggers the unfolded protein response in yeast. *Biochem. Biophys. Res. Commun.* **279**, 445-450. doi:10.1006/bbrc.2000.3987
- Oono, K., Yoneda, T., Manabe, T., Yamagishi, S., Matsuda, S., Hitomi, J., Miyata, S., Mizuno, T., Imaizumi, K., Katayama, T. et al. (2004). JAB1 participates in unfolded protein responses by association and dissociation with IRE1. *Neurochem. Int.* **45**, 765-772. doi:10.1016/j.neuint.2004.01.003
- Osorio, F., Lambrecht, B. N. and Janssens, S. (2018). Antigen presentation unfolded: identifying convergence points between the UPR and antigen presentation pathways. *Curr. Opin. Immunol.* **52**, 100-107. doi:10.1016/j.coi.2018.04.020
- Ota, A. and Wang, Y. (2012). Cdc37/Hsp90 protein-mediated regulation of IRE1alpha protein activity in endoplasmic reticulum stress response and insulin synthesis in INS-1 cells. *J. Biol. Chem.* **287**, 6266-6274. doi:10.1074/jbc.M111.331264
- Pattingre, S., Tassa, A., Qu, X., Garuti, R., Liang, X. H., Mizushima, N., Packer, M., Schneider, M. D. and Levine, B. (2005). Bcl-2 antiapoptotic proteins inhibit Beclin 1-dependent autophagy. *Cell* **122**, 927-939. doi:10.1016/j.cell.2005.07.002
- Pattingre, S., Bauvy, C., Carpentier, S., Levade, T., Levine, B. and Codogno, P. (2009). Role of JNK1-dependent Bcl-2 phosphorylation in ceramide-induced macroautophagy. *J. Biol. Chem.* **284**, 2719-2728. doi:10.1074/jbc.M805920200
- Pinkaew, D., Chattopadhyay, A., King, M. D., Chunhacha, P., Liu, Z., Stevenson, H. L., Chen, Y., Sinthujaroen, P., McDougal, O. M. and Fujise, K. (2017). Fortilin binds IRE1alpha and prevents ER stress from signaling apoptotic cell death. *Nat. Commun.* **8**, 18. doi:10.1038/s41467-017-00029-1
- Plumb, R., Zhang, Z. R., Appathurai, S. and Mariappan, M. (2015). A functional link between the co-translational protein translocation pathway and the UPR. *eLife* **4**, e07426. doi:10.7554/eLife.07426
- Preissler, S. and Ron, D. (2019). Early events in the endoplasmic reticulum unfolded protein response. *Cold Spring Harb. Perspect. Biol.* **11**, a033894. doi:10.1101/cshperspect.a033894
- Prischi, F., Nowak, P. R., Carrara, M. and Ali, M. M. (2014). Phosphoregulation of Ire1 RNase splicing activity. *Nat. Commun.* **5**, 3554. doi:10.1038/ncomms4554
- Qiu, Y., Mao, T., Zhang, Y., Shao, M., You, J., Ding, Q., Chen, Y., Wu, D., Xie, D., Lin, X. et al. (2010). A crucial role for RACK1 in the regulation of glucose-stimulated IRE1alpha activation in pancreatic beta cells. *Sci. Signal.* **3**, ra7. doi:10.1126/scisignal.2000514
- Rashid, H. O., Yadav, R. K., Kim, H. R. and Chae, H. J. (2015). ER stress: autophagy induction, inhibition and selection. *Autophagy* **11**, 1956-1977. doi:10.1080/15548627.2015.1091141
- Ricci, D., Marrocco, I., Blumenthal, D., Dibos, M., Eletto, D., Vargas, J., Boyle, S., Iwamoto, Y., Chomistek, S., Paton, J. C. et al. (2019). Clustering of IRE1alpha depends on sensing ER stress but not on its RNase activity. *FASEB J.* **33**, 9811-9827. doi:10.1096/fj.201801240RR
- Rodríguez, D. A., Zamorano, S., Lisbona, F., Rojas-Rivera, D., Urrea, H., Cubillos-Ruiz, J. R., Armisen, R., Henriquez, D. R., Cheng, E. H., Letek, M. et al. (2012). BH3-only proteins are part of a regulatory network that control the sustained signalling of the unfolded protein response sensor IRE1alpha. *EMBO J.* **31**, 2322-2335. doi:10.1038/emboj.2012.84
- Rojas-Rivera, D., Rodríguez, D. A., Sepulveda, D. and Hetz, C. (2018). ER stress sensing mechanism: putting off the brake on UPR transducers. *Oncotarget* **9**, 19461-19462. doi:10.18632/oncotarget.25114
- Saito, A., Cai, L., Matsuhisa, K., Ohtake, Y., Kaneko, M., Kanemoto, S., Asada, R. and Imaizumi, K. (2018). Neuronal activity-dependent local activation of dendritic unfolded protein response promotes expression of brain-derived neurotrophic factor in cell soma. *J. Neurochem.* **144**, 35-49. doi:10.1111/jnc.14221
- Sarkisian, M. R., Bartley, C. M. and Rakic, P. (2008). Trouble making the first move: interpreting arrested neuronal migration in the cerebral cortex. *Trends Neurosci.* **31**, 54-61. doi:10.1016/j.tins.2007.11.009
- Schwarz, D. S. and Blower, M. D. (2016). The endoplasmic reticulum: structure, function and response to cellular signaling. *Cell. Mol. Life Sci.* **73**, 79-94. doi:10.1007/s00018-015-2052-6
- Sepulveda, D., Rojas-Rivera, D., Rodríguez, D. A., Groenendyk, J., Köhler, A., Lebeaupin, C., Ito, S., Urrea, H., Carreras-Sureda, A., Hazari, Y. et al. (2018). Interactome screening identifies the ER luminal chaperone Hsp47 as a regulator of the unfolded protein response transducer IRE1alpha. *Mol. Cell* **69**, 238-252.e7. doi:10.1016/j.molcel.2017.12.028
- Shemorry, A., Harnoss, J. M., Guttman, O., Marsters, S. A., Kómúves, L. G., Lawrence, D. A. and Ashkenazi, A. (2019). Caspase-mediated cleavage of IRE1 controls apoptotic cell commitment during endoplasmic reticulum stress. *eLife* **8**, e47084. doi:10.7554/eLife.47084
- Shen, J., Chen, X., Hendershot, L. and Prywes, R. (2002). ER stress regulation of ATF6 localization by dissociation of BiP/GRP78 binding and unmasking of Golgi localization signals. *Dev. Cell* **3**, 99-111. doi:10.1016/S1534-5807(02)00203-4
- Shin, G. C., Moon, S. U., Kang, H. S., Choi, H. S., Han, H. D. and Kim, K. H. (2019). PRKCSH contributes to tumorigenesis by selective boosting of IRE1 signaling pathway. *Nat. Commun.* **10**, 3185. doi:10.1038/s41467-019-11019-w
- Sun, S., Shi, G., Sha, H., Ji, Y., Han, X., Shu, X., Ma, H., Inoue, T., Gao, B., Kim, H. et al. (2015). IRE1alpha is an endogenous substrate of endoplasmic-reticulum-associated degradation. *Nat. Cell Biol.* **17**, 1546-1555. doi:10.1038/ncb3266
- Sundaram, A., Plumb, R., Appathurai, S. and Mariappan, M. (2017). The Sec23 translocan limits IRE1alpha signaling during the unfolded protein response. *eLife* **6**, e27187. doi:10.7554/eLife.27187
- Tabas, I. and Ron, D. (2011). Integrating the mechanisms of apoptosis induced by endoplasmic reticulum stress. *Nat. Cell Biol.* **13**, 184-190. doi:10.1038/ncb03111-184
- Taguchi, Y., Imaoka, K., Kataoka, M., Uda, A., Nakatsu, D., Horii-Okazaki, S., Kunishige, R., Kano, F. and Murata, M. (2015). Yip1A, a novel host factor for the activation of the IRE1 pathway of the unfolded protein response during Brucella infection. *PLoS Pathog.* **11**, e1004747. doi:10.1371/journal.ppat.1004747
- Takeda, K., Nagashima, S., Shiiba, I., Uda, A., Tokuyama, T., Ito, N., Fukuda, T., Matsushita, N., Ishido, S., Iwawaki, T. et al. (2019). MITOL prevents ER stress-induced apoptosis by IRE1alpha ubiquitylation at ER-mitochondria contact sites. *EMBO J.* **38**, e100999. doi:10.15252/embj.2018100999
- Tam, A. B., Roberts, L. S., Chandra, V., Rivera, I. G., Nomura, D. K., Forbes, D. J. and Niwa, M. (2018). The UPR activator ATF6 responds to proteotoxic and

- lipotoxic stress by distinct mechanisms. *Dev. Cell* **46**, 327-343.e7. doi:10.1016/j.devcel.2018.04.023
- Tang, C. H., Chang, S., Paton, A. W., Paton, J. C., Gabrilovich, D. I., Ploegh, H. L., Del Valle, J. R. and Hu, C. C.** (2018). Phosphorylation of IRE1 at S729 regulates RIDD in B cells and antibody production after immunization. *J. Cell Biol.* **217**, 1739-1755. doi:10.1083/jcb.201709137
- Tavernier, Q., Bennana, E., Poindessous, V., Schaeffer, C., Rampoldi, L., Pietrancosta, N. and Pallet, N.** (2018). Regulation of IRE1 RNase activity by the ribonuclease inhibitor 1 (RNH1). *Cell Cycle* **17**, 1901-1916. doi:10.1080/15384101.2018.1506655
- Tschurtschenthaler, M., Adolph, T. E., Ashcroft, J. W., Niederreiter, L., Bharti, R., Saveljeva, S., Bhattacharyya, J., Flak, M. B., Shih, D. Q., Fuhler, G. M. et al.** (2017). Defective ATG16L1-mediated removal of IRE1alpha drives Crohn's disease-like ileitis. *J. Exp. Med.* **214**, 401-422. doi:10.1084/jem.20160791
- Urano, F., Wang, X., Bertolotti, A., Zhang, Y., Chung, P., Harding, H. P. and Ron, D.** (2000). Coupling of stress in the ER to activation of JNK protein kinases by transmembrane protein kinase IRE1. *Science* **287**, 664-666. doi:10.1126/science.287.5453.664
- Urrea, H., Dufey, E., Lisbona, F., Rojas-Rivera, D. and Hetz, C.** (2013). When ER stress reaches a dead end. *Biochim. Biophys. Acta* **1833**, 3507-3517. doi:10.1016/j.bbamcr.2013.07.024
- Urrea, H., Henriquez, D. R., Cánovas, J., Villarroel-Campos, D., Carreras-Sureda, A., Pulgar, E., Molina, E., Hazari, Y. M., Limia, C. M., Alvarez-Rojas, S. et al.** (2018). IRE1alpha governs cytoskeleton remodelling and cell migration through a direct interaction with filamin A. *Nat. Cell Biol.* **20**, 942-953. doi:10.1038/s41556-018-0141-0
- van Niel, G., D'Angelo, G. and Raposo, G.** (2018). Shedding light on the cell biology of extracellular vesicles. *Nat. Rev. Mol. Cell Biol.* **19**, 213-228. doi:10.1038/nrm.2017.125
- van Vliet, A. R., Giordano, F., Gerlo, S., Segura, I., Van Eygen, S., Molenberghs, G., Rocha, S., Houcine, A., Derua, R., Verfaillie, T. et al.** (2017). The ER stress sensor PERK coordinates ER-plasma membrane contact site formation through interaction with filamin-A and F-actin remodeling. *Mol. Cell* **65**, 885-899.e6. doi:10.1016/j.molcel.2017.01.020
- Vattem, K. M. and Wek, R. C.** (2004). Reinitiation involving upstream ORFs regulates ATF4 mRNA translation in mammalian cells. *Proc. Natl. Acad. Sci. USA* **101**, 11269-11274. doi:10.1073/pnas.0400541101
- Verchot, J.** (2016). How does the stressed out ER find relief during virus infection? *Curr. Opin. Virol.* **17**, 74-79. doi:10.1016/j.coviro.2016.01.018
- Vidal, R. L., Figueroa, A., Court, F. A., Thielen, P., Molina, C., Wirth, C., Caballero, B., Kiffin, R., Segura-Aguilar, J., Cuervo, A. M. et al.** (2012). Targeting the UPR transcription factor XBP1 protects against Huntington's disease through the regulation of FoxO1 and autophagy. *Hum. Mol. Genet.* **21**, 2245-2262. doi:10.1093/hmg/ddc040
- Volmer, R., van der Ploeg, K. and Ron, D.** (2013). Membrane lipid saturation activates endoplasmic reticulum unfolded protein response transducers through their transmembrane domains. *Proc. Natl. Acad. Sci. USA* **110**, 4628-4633. doi:10.1073/pnas.1217611110
- Walter, P. and Ron, D.** (2011). The unfolded protein response: from stress pathway to homeostatic regulation. *Science* **334**, 1081-1086. doi:10.1126/science.1209038
- Wang, M. and Kaufman, R. J.** (2016). Protein misfolding in the endoplasmic reticulum as a conduit to human disease. *Nature* **529**, 326-335. doi:10.1038/nature17041
- Wang, L., Perera, B. G. K., Hari, S. B., Bhatarai, B., Backes, B. J., Seeliger, M. A., Schürer, S. C., Oakes, S. A., Papa, F. R. and Maly, D. J.** (2012). Divergent allosteric control of the IRE1alpha endoribonuclease using kinase inhibitors. *Nat. Chem. Biol.* **8**, 982-989. doi:10.1038/nchembio.1094
- Wang, J.-M., Qiu, Y., Yang, Z., Kim, H., Qian, Q., Sun, Q., Zhang, C., Yin, L., Fang, D., Back, S. H. et al.** (2018a). IRE1alpha prevents hepatic steatosis by processing and promoting the degradation of select microRNAs. *Sci. Signal.* **11**, ea04617. doi:10.1126/scisignal.a04617
- Wang, P., Li, J., Tao, J. and Sha, B.** (2018b). The luminal domain of the ER stress sensor protein PERK binds misfolded proteins and thereby triggers PERK oligomerization. *J. Biol. Chem.* **293**, 4110-4121. doi:10.1074/jbc.RA117.001294
- Weatherbee, J. L., Kraus, J. L. and Ross, A. H.** (2016). ER stress in temozolomide-treated glioblastomas interferes with DNA repair and induces apoptosis. *Oncotarget* **7**, 43820-43834. doi:10.18632/oncotarget.9907
- Yamamori, T., Meike, S., Nagane, M., Yasui, H. and Inanami, O.** (2013). ER stress suppresses DNA double-strand break repair and sensitizes tumor cells to ionizing radiation by stimulating proteasomal degradation of Rad51. *FEBS Lett.* **587**, 3348-3353. doi:10.1016/j.febslet.2013.08.030
- Yamamoto, K., Sato, T., Matsui, T., Sato, M., Okada, T., Yoshida, H., Harada, A. and Mori, K.** (2007). Transcriptional induction of mammalian ER quality control proteins is mediated by single or combined action of ATF6alpha and XBP1. *Dev. Cell* **13**, 365-376. doi:10.1016/j.devcel.2007.07.018
- Yanagitani, K., Imagawa, Y., Iwawaki, T., Hosoda, A., Saito, M., Kimata, Y. and Kohno, K.** (2009). Cotranslational targeting of XBP1 protein to the membrane promotes cytoplasmic splicing of its own mRNA. *Mol. Cell* **34**, 191-200. doi:10.1016/j.molcel.2009.02.033
- Yanagitani, K., Kimata, Y., Kadokura, H. and Kohno, K.** (2011). Translational pausing ensures membrane targeting and cytoplasmic splicing of XBP1 mRNA. *Science* **331**, 586-589. doi:10.1126/science.1197142
- Yang, L., Calay, E. S., Fan, J., Arduini, A., Kunz, R. C., Gygi, S. P., Yalcin, A., Fu, S. and Hotamisligil, G. S.** (2015). METABOLISM. S-Nitrosylation links obesity-associated inflammation to endoplasmic reticulum dysfunction. *Science* **349**, 500-506. doi:10.1126/science.aaa0079
- Yoneda, T., Imaizumi, K., Oono, K., Yui, D., Gomi, F., Katayama, T. and Tohyama, M.** (2001). Activation of caspase-12, an endoplasmic reticulum (ER) resident caspase, through tumor necrosis factor receptor-associated factor 2-dependent mechanism in response to the ER stress. *J. Biol. Chem.* **276**, 13935-13940. doi:10.1074/jbc.M010677200
- Yoshida, H., Matsui, T., Yamamoto, A., Okada, T. and Mori, K.** (2001). XBP1 mRNA is induced by ATF6 and spliced by IRE1 in response to ER stress to produce a highly active transcription factor. *Cell* **107**, 881-891. doi:10.1016/S0092-8674(01)00611-0
- Yu, J., Li, T., Liu, Y., Wang, X., Zhang, J., Wang, X., Shi, G., Lou, J., Wang, L., Wang, C.-C. et al.** (2020). Phosphorylation switches protein disulfide isomerase activity to maintain proteostasis and attenuate ER stress. *EMBO J.* **39**, e103841. doi:10.15252/embj.2019103841
- Zhou, J., Liu, C. Y., Back, S. H., Clark, R. L., Peisach, D., Xu, Z. and Kaufman, R. J.** (2006). The crystal structure of human IRE1 luminal domain reveals a conserved dimerization interface required for activation of the unfolded protein response. *Proc. Natl. Acad. Sci. USA* **103**, 14343-14348. doi:10.1073/pnas.0606480103
- Zhou, A.-X., Hartwig, J. H. and Akyürek, L. M.** (2010). Filamins in cell signaling, transcription and organ development. *Trends Cell Biol.* **20**, 113-123. doi:10.1016/j.tcb.2009.12.001
- Zhu, X., Zhang, J., Sun, H., Jiang, C., Dong, Y., Shan, Q., Su, S., Xie, Y., Xu, N., Lou, X. et al.** (2014). Ubiquitination of inositol-requiring enzyme 1 (IRE1) by the E3 ligase CHIP mediates the IRE1/TRAF2/JNK pathway. *J. Biol. Chem.* **289**, 30567-30577. doi:10.1074/jbc.M114.562868
